# Supplementary material for: GA-Based Early Warning Method for Rock Burst with Microseismic and Acoustic Emission in Steeply Inclined Coal Seam
Source: Hindawi journal article supplement (doi:10.1155/2020/8865654), 2020-09-03
Supplement: f1 [file 8865654.f1.xlsx]

## Sheet: MS
No.	Date	Time	X	Y	Z	Energy
1	2016-06-06	09:35:16	1481	4581	450	560
2	2016-06-07	07:47:34	1248	4399	464	480
3	2016-06-08	20:54:21	1120	4404	453	2300
4	2016-06-08	23:53:49	1120	4420	461	5100
5	2016-06-11	17:34:46	2791	5297	453	490
6	2016-06-11	17:35:09	2805	5297	451	360
7	2016-06-11	17:35:35	2747	5244	457	53
8	2016-06-11	17:35:54	2741	5250	457	250
9	2016-06-11	17:36:20	2741	5250	457	340
10	2016-06-11	17:36:48	2741	5250	457	490
11	2016-06-12	12:00:08	2834	5383	453	3300
12	2016-06-12	12:19:37	2741	5250	458	34
13	2016-06-12	21:32:10	2728	5292	458	26000
14	2016-06-12	23:59:30	2751	5304	458	1300
15	2016-06-14	05:26:27	2627	5190	458	36000
16	2016-06-14	18:04:04	2768	5322	458	33000
17	2016-06-21	10:46:16	2538	5235	453	6300
18	2016-06-29	03:11:42	2768	5359	458	12000
19	2016-06-29	18:47:20	2766	5349	456	650
20	2016-06-29	23:15:00	2769	5324	458	54
21	2016-07-01	04:32:49	2789	5401	458	24000000
22	2016-07-09	23:07:55	2768	5333	459	2800
23	2016-07-09	23:08:16	2842	5272	459	33000
24	2016-07-12	21:52:02	2880	5320	459	420000
25	2016-07-13	15:12:32	2822	5318	458	510
26	2016-07-14	14:19:27	2842	5278	459	16000
27	2016-07-20	11:56:22	2753	5313	458	24
28	2016-07-21	21:44:09	2753	5270	458	6.8
29	2016-07-21	21:48:39	2765	5270	458	7.3
30	2016-07-22	04:28:37	2734	5243	458	0.18
31	2016-07-22	05:30:50	2765	5319	458	260
32	2016-08-08	22:13:28	2768	5307	458	80000
33	2016-08-16	05:45:41	2768	5307	458	1000
34	2016-08-18	13:51:57	2778	5313	459	3300
35	2016-08-18	19:48:02	2859	5298	459	2000
36	2016-08-18	21:06:29	2643	5293	460	2500
37	2016-08-18	22:06:05	2736	5207	459	1600
38	2016-08-18	23:05:46	2758	5303	459	2000
39	2016-08-18	23:06:44	2736	5307	459	4900
40	2016-08-18	23:35:54	2763	5313	459	56000
41	2016-08-19	04:43:30	2815	5330	459	1400
42	2016-08-19	08:51:38	2741	5259	458	4400
43	2016-08-19	09:21:14	2844	5286	458	79
44	2016-08-19	09:31:20	2668	5307	458	6100
45	2016-08-19	13:18:38	2746	5270	458	670
46	2016-08-19	13:38:45	2734	5293	458	6.4
47	2016-08-19	13:48:47	2851	5286	459	46
48	2016-08-19	15:01:51	2886	5345	459	19000
49	2016-08-19	15:37:09	2686	5269	460	3200
50	2016-08-19	16:00:39	2813	5293	458	470
51	2016-08-19	17:32:34	2736	5336	459	7000
52	2016-08-20	00:14:43	2850	5290	459	180
53	2016-08-20	04:26:58	2813	5276	458	8800
54	2016-08-20	06:27:47	2618	5298	458	5600
55	2016-08-20	08:25:09	2862	5330	459	230
56	2016-08-21	15:16:01	2833	5336	460	300
57	2016-08-21	16:31:17	2833	5275	460	64000
58	2016-08-21	22:32:35	2833	5313	460	170
59	2016-08-22	14:00:45	2773	5307	459	250
60	2016-08-22	14:35:32	2803	5330	458	180
61	2016-08-22	14:45:07	2826	5269	459	24000
62	2016-08-22	15:15:11	2815	5286	459	470
63	2016-08-22	15:54:45	2859	5295	459	23000
64	2016-08-22	16:51:13	2739	5289	459	390
65	2016-08-22	19:07:28	2908	5289	459	350
66	2016-08-22	22:13:08	2773	5309	460	8900
67	2016-08-23	04:48:38	2870	5272	460	910
68	2016-08-23	05:09:15	2771	5309	460	9100
69	2016-08-23	05:09:27	2804	5309	460	340
70	2016-08-23	06:48:20	2771	5309	459	130
71	2016-08-23	08:34:11	2826	5280	460	1600
72	2016-08-23	12:01:07	2881	5325	459	6100
73	2016-08-23	15:10:01	2706	5315	460	6200
74	2016-08-23	19:48:16	2836	5283	460	91
75	2016-08-23	19:56:01	2675	5218	459	36
76	2016-08-23	20:31:27	2804	5273	459	19
77	2016-08-23	21:17:13	2796	5325	460	11000
78	2016-08-23	21:21:22	2697	5294	460	6000
79	2016-08-23	21:40:30	2697	5294	460	1300
80	2016-08-23	22:41:50	2856	5299	459	14
81	2016-08-24	03:27:39	2836	5283	460	880
82	2016-08-24	08:16:39	2719	5272	460	18
83	2016-08-24	08:30:13	2675	5317	460	1200
84	2016-08-24	14:39:48	2771	5247	459	340
85	2016-08-24	17:38:08	2751	5221	459	350
86	2016-08-24	19:15:43	2816	5299	460	63
87	2016-08-24	19:17:04	2771	5325	460	330
88	2016-08-24	19:27:42	2771	5325	460	110
89	2016-08-24	19:27:49	2726	5325	460	400
90	2016-08-24	19:53:59	2881	5189	459	300
91	2016-08-24	20:08:07	2719	5325	460	1200
92	2016-08-24	20:32:23	2896	5205	459	55
93	2016-08-24	21:08:37	2888	5205	459	250
94	2016-08-24	22:08:54	2896	5325	459	22
95	2016-08-25	03:04:10	2848	5189	460	64
96	2016-08-25	04:01:48	2901	5325	459	1200
97	2016-08-25	04:07:15	2888	5273	460	1100
98	2016-08-25	06:16:17	2759	5315	460	100
99	2016-08-26	02:53:58	2796	5325	460	330
100	2016-08-26	08:30:50	2763	5341	460	34000
101	2016-08-26	13:58:00	2633	5280	460	48000
102	2016-08-26	19:33:52	2791	5247	459	120
103	2016-08-26	20:33:19	2784	5325	460	2600
104	2016-08-26	20:43:46	2789	5295	460	3300
105	2016-08-27	04:18:51	2796	5267	459	100
106	2016-08-27	10:21:34	2765	5269	460	590
107	2016-08-27	16:11:50	2858	5340	459	490
108	2016-08-27	17:07:43	2697	5280	460	28
109	2016-08-27	17:11:20	2776	5270	459	720
110	2016-08-27	19:29:45	2756	5290	459	1300
111	2016-08-27	19:30:52	2796	5325	460	8300
112	2016-08-27	19:35:58	2809	5266	459	3600
113	2016-08-27	20:01:09	2771	5283	460	71
114	2016-08-27	20:12:41	2744	5273	460	36
115	2016-08-27	20:54:35	2817	5298	459	130
116	2016-08-27	21:02:43	2784	5283	459	2500
117	2016-08-28	00:15:40	2855	5299	459	790
118	2016-08-28	00:33:26	2731	5325	460	23000
119	2016-08-28	02:47:48	2699	5309	460	140
120	2016-08-28	02:57:24	2821	5304	459	1100
121	2016-08-28	03:06:15	2711	5296	460	150
122	2016-08-28	03:18:06	2816	5273	459	1500
123	2016-08-28	03:43:16	2784	5283	459	8500
124	2016-08-28	03:44:14	2710	5333	460	5600
125	2016-08-28	04:15:32	2771	5267	460	60
126	2016-08-28	04:33:10	2815	5305	460	14000
127	2016-08-28	04:34:37	2817	5375	460	1700
128	2016-08-28	04:35:48	2776	5254	458	1.9
129	2016-08-28	04:43:56	2747	5266	459	180
130	2016-08-28	05:00:34	2748	5228	459	150
131	2016-08-28	05:06:24	2819	5278	459	870
132	2016-08-28	05:11:45	2743	5283	460	550
133	2016-08-28	05:40:52	2805	5274	459	120
134	2016-08-28	05:44:50	2759	5257	460	340
135	2016-08-28	05:50:13	2764	5299	460	40
136	2016-08-28	05:58:10	2697	5245	458	0.4
137	2016-08-28	07:48:56	2779	5280	459	630
138	2016-08-28	08:18:59	2856	5285	460	15
139	2016-08-28	09:33:55	2804	5283	459	3400
140	2016-08-28	10:28:22	2833	5341	459	670
141	2016-08-28	12:32:34	2824	5273	459	790
142	2016-08-28	16:24:15	2864	5325	459	210
143	2016-08-28	19:19:04	2693	5309	460	1400
144	2016-08-28	19:43:37	2764	5241	459	4800
145	2016-08-28	19:44:48	2804	5241	459	16000
146	2016-08-28	19:53:54	2675	5251	460	870
147	2016-08-28	19:59:14	2759	5299	459	120
148	2016-08-28	20:36:22	2756	5309	460	3800
149	2016-08-28	21:28:31	2764	5283	460	930
150	2016-08-28	21:31:20	2719	5289	460	4000
151	2016-08-28	22:35:19	2629	5251	459	3600
152	2016-08-28	22:38:16	2776	5325	460	230
153	2016-08-28	22:53:08	2776	5309	460	7000
154	2016-08-29	02:45:29	2756	5266	459	180
155	2016-08-29	02:56:49	2856	5299	459	3700
156	2016-08-29	03:16:27	2714	5251	459	1500
157	2016-08-29	03:17:11	2836	5257	460	3400
158	2016-08-29	03:54:18	2784	5247	460	6500
159	2016-08-29	04:10:05	2773	5341	460	530
160	2016-08-29	04:39:55	2736	5341	460	65000
161	2016-08-29	04:46:42	2816	5257	459	240000
162	2016-08-29	05:04:19	2796	5283	459	410
163	2016-08-29	05:59:37	2824	5267	459	4000
164	2016-08-29	06:17:40	2816	5267	459	610
165	2016-08-29	08:04:31	2751	5315	459	2100
166	2016-08-29	08:25:21	2699	5289	460	1400
167	2016-08-29	09:11:13	2713	5309	459	1400
168	2016-08-29	09:24:50	2849	5295	460	1200
169	2016-08-29	11:53:35	2763	5332	460	730
170	2016-08-29	12:16:54	2764	5283	460	120
171	2016-08-29	14:18:23	2730	5206	459	4300
172	2016-08-29	14:21:59	2751	5221	459	240
173	2016-08-29	15:00:29	2746	5220	459	6600
174	2016-08-29	15:28:37	2751	5231	459	13000
175	2016-08-29	19:25:03	2719	5167	459	52
176	2016-08-29	20:04:56	2836	5289	460	1200
177	2016-08-29	20:20:44	2776	5273	459	140
178	2016-08-29	21:22:21	2789	5248	460	320
179	2016-08-29	21:46:44	2756	5341	460	670
180	2016-08-30	03:17:25	2660	5206	460	7900
181	2016-08-30	04:16:09	2784	5189	460	29000
182	2016-08-30	05:42:49	2791	5289	460	2600
183	2016-08-30	07:43:56	2668	5317	460	2400
184	2016-08-30	08:14:44	2784	5299	460	96
185	2016-08-30	08:19:33	2844	5273	460	7300
186	2016-08-30	08:48:14	2804	5283	459	36
187	2016-08-30	09:09:07	2751	5325	460	490
188	2016-08-30	14:48:39	2679	5189	459	720
189	2016-08-30	19:18:55	2856	5267	460	3300
190	2016-08-30	20:25:45	2730	5295	460	6300
191	2016-08-30	21:02:02	2784	5267	459	1500
192	2016-08-30	21:56:23	2804	5289	459	3500
193	2016-08-30	22:34:28	2771	5267	460	1600
194	2016-08-30	22:45:42	2751	5315	460	60
195	2016-08-31	03:38:25	2640	5317	460	1400
196	2016-08-31	03:50:25	2779	5341	460	820
197	2016-08-31	04:16:48	2711	5325	460	2200
198	2016-08-31	05:31:22	2713	5280	460	2900
199	2016-08-31	05:39:26	2791	5257	459	8000
200	2016-08-31	06:21:52	2713	5197	460	500
201	2016-08-31	07:18:11	2806	5272	460	3300
202	2016-08-31	07:22:46	1309	4318	482	1900
203	2016-08-31	07:39:23	2849	5341	459	3900
204	2016-08-31	08:03:31	2849	5341	459	1800
205	2016-08-31	08:29:18	2833	5327	459	5200
206	2016-08-31	08:37:48	2730	5295	460	750
207	2016-08-31	09:08:16	2876	5280	460	770
208	2016-08-31	10:40:19	2836	5283	460	2900
209	2016-08-31	19:04:42	2763	5309	460	510
210	2016-08-31	19:32:49	2713	5280	460	3100
211	2016-08-31	19:51:31	2713	5280	460	310
212	2016-08-31	20:38:37	2731	5315	459	120
213	2016-09-01	03:34:01	2736	5295	460	1200
214	2016-09-01	04:10:19	2719	5289	460	450
215	2016-09-01	04:15:25	2719	5289	460	310
216	2016-09-01	04:18:58	2713	5280	460	240
217	2016-09-01	06:14:01	2731	5315	459	17000
218	2016-09-01	06:14:22	2731	5325	460	69000
219	2016-09-01	06:27:49	2726	5325	460	7300
220	2016-09-01	06:28:14	2776	5325	460	800
221	2016-09-01	06:28:38	2731	5325	460	44000
222	2016-09-01	07:08:41	2816	5267	459	310
223	2016-09-01	07:28:53	2763	5309	460	3500
224	2016-09-01	15:07:40	2751	5257	460	60
225	2016-09-01	18:02:17	2819	5315	460	1200
226	2016-09-01	19:41:52	2745	5293	460	570
227	2016-09-01	19:53:36	2756	5310	460	920
228	2016-09-01	20:08:56	2646	5267	460	300
229	2016-09-01	21:35:20	2751	5290	460	93
230	2016-09-01	22:28:07	2796	5289	460	87
231	2016-09-02	00:00:46	2790	5279	460	91
232	2016-09-02	01:00:28	2776	5250	459	140
233	2016-09-02	03:42:50	2743	5283	460	3100
234	2016-09-02	03:46:59	2771	5257	460	7600
235	2016-09-02	04:11:04	2771	5267	460	590
236	2016-09-02	05:34:04	2719	5325	459	160
237	2016-09-02	06:19:37	2791	5289	460	150
238	2016-09-02	13:23:15	2773	5280	460	2200
239	2016-09-02	14:35:24	2746	5234	460	630
240	2016-09-02	22:40:28	2693	5272	460	200
241	2016-09-03	00:06:37	2746	5289	460	26000
242	2016-09-03	00:39:51	2703	5272	460	10000
243	2016-09-03	00:53:47	2763	5341	460	4100
244	2016-09-03	01:24:23	2657	5259	460	180
245	2016-09-03	01:45:39	2866	5325	460	9700
246	2016-09-03	01:48:15	2733	5231	459	850
247	2016-09-03	03:20:34	2666	5257	460	320
248	2016-09-03	03:28:17	2767	5242	459	260
249	2016-09-03	03:52:06	2795	5289	460	320
250	2016-09-03	03:53:15	2693	5272	460	670
251	2016-09-03	04:24:35	2666	5257	460	9300
252	2016-09-03	05:20:50	2763	5272	460	82000
253	2016-09-03	05:25:57	2763	5266	460	670000
254	2016-09-03	06:04:23	2746	5229	459	1200
255	2016-09-03	07:42:47	2736	5220	459	9400
256	2016-09-03	13:18:29	2695	5289	460	3200
257	2016-09-05	18:59:42	2657	5269	460	390
258	2016-09-05	19:45:24	2730	5220	460	6200
259	2016-09-05	20:13:08	2730	5220	459	1100
260	2016-09-05	20:17:10	2800	5341	459	2900
261	2016-09-05	20:43:22	2676	5266	460	480
262	2016-09-06	03:38:16	2763	5341	460	26000
263	2016-09-06	07:01:56	2748	5315	460	120
264	2016-09-06	08:50:31	2746	5234	460	440
265	2016-09-06	09:35:21	2795	5257	459	9600
266	2016-09-06	11:45:03	2772	5179	459	150
267	2016-09-06	13:54:04	1211	4324	504	7100
268	2016-09-06	20:01:21	2713	5211	460	650
269	2016-09-06	21:30:43	2781	5257	459	1600
270	2016-09-06	22:28:07	2746	5341	459	930
271	2016-09-07	00:05:22	2616	5206	460	7100
272	2016-09-07	02:44:09	2704	5179	459	780
273	2016-09-07	03:04:25	2779	5191	459	240
274	2016-09-07	04:20:56	2676	5266	460	2200
275	2016-09-07	04:41:48	2789	5197	459	960
276	2016-09-07	05:32:16	2773	5266	459	81
277	2016-09-07	07:21:03	2676	5266	460	58
278	2016-09-07	18:16:05	2666	5231	459	210
279	2016-09-07	19:55:39	2736	5242	459	12000
280	2016-09-07	20:27:39	2686	5269	460	46
281	2016-09-07	20:36:13	2781	5257	459	420
282	2016-09-07	22:06:03	2643	5231	460	590
283	2016-09-07	22:38:09	2648	5257	460	260
284	2016-09-08	00:00:02	2760	5248	459	280
285	2016-09-08	03:59:04	2686	5269	460	430
286	2016-09-08	05:42:58	2757	5283	460	8900
287	2016-09-08	05:50:21	2766	5267	460	9000
288	2016-09-08	08:40:13	2749	5248	459	2200
289	2016-09-08	11:07:47	2686	5269	460	170
290	2016-09-09	03:40:20	2696	5235	460	39
291	2016-09-09	05:01:25	2719	5235	458	8600
292	2016-09-09	06:21:30	2772	5289	459	1100
293	2016-09-09	06:28:20	2760	5243	459	1500
294	2016-09-09	07:11:41	2736	5246	458	200
295	2016-09-09	09:33:11	2803	5266	460	9700
296	2016-09-09	20:18:30	2662	5149	459	85000
297	2016-09-09	21:37:01	2618	5168	459	54000
298	2016-09-10	03:39:22	2676	5220	459	190
299	2016-09-10	04:00:17	2736	5243	460	300
300	2016-09-10	04:53:01	2713	5266	459	430
301	2016-09-10	05:52:56	2730	5234	459	58000
302	2016-09-10	21:00:13	2633	5183	459	1800
303	2016-09-10	21:28:45	2693	5272	459	2800
304	2016-09-10	21:28:50	2676	5099	460	80000
305	2016-09-10	21:49:23	2632	5149	459	82000
306	2016-09-10	22:02:43	2703	5206	459	880
307	2016-09-11	01:52:43	2686	5234	459	6400
308	2016-09-11	03:32:17	2693	5318	460	6200
309	2016-09-11	05:25:55	2676	5220	459	2000
310	2016-09-11	06:23:25	2595	5149	459	26000
311	2016-09-11	06:58:16	2498	5097	460	2300
312	2016-09-17	03:04:02	2606	5183	459	1500
313	2016-09-17	03:34:49	2693	5206	459	660
314	2016-09-17	03:52:54	2676	5220	459	6400
315	2016-09-17	04:14:09	2640	5182	458	1300
316	2016-09-17	07:24:49	2633	5136	459	13000
317	2016-09-17	07:41:01	2633	5220	459	1400
318	2016-09-17	15:01:52	2666	5174	459	510
319	2016-09-17	15:49:04	2800	5327	459	3800
320	2016-09-17	21:45:13	2710	5328	460	5400
321	2016-09-17	23:18:33	2800	5189	459	18000
322	2016-09-18	00:28:02	2730	5234	460	300
323	2016-09-18	03:58:38	2680	5328	460	2000
324	2016-09-18	04:22:58	2662	5281	460	7200
325	2016-09-18	06:03:17	2632	5253	460	1700
326	2016-09-18	07:21:54	2778	5182	459	4600
327	2016-09-18	09:56:41	2826	5197	459	4100
328	2016-09-18	11:43:27	2826	5191	459	2800
329	2016-09-18	18:40:49	2657	5257	460	450
330	2016-09-18	19:47:43	2736	5211	460	310
331	2016-09-18	22:03:05	2770	5189	459	1800
332	2016-09-18	23:51:48	2763	5191	459	8200
333	2016-09-19	01:59:15	2876	5341	460	3700
334	2016-09-19	03:47:55	2763	5183	459	800
335	2016-09-19	04:07:27	2736	5206	459	6900
336	2016-09-19	05:15:28	2713	5272	460	580
337	2016-09-19	06:24:51	2713	5243	459	5100
338	2016-09-19	07:37:27	2789	5191	459	280
339	2016-09-19	07:50:56	2423	5136	459	53000
340	2016-09-19	08:21:50	2730	5332	460	80000
341	2016-09-23	21:09:35	2722	5235	459	180
342	2016-09-25	02:58:54	2602	5182	459	940
343	2016-09-25	03:14:07	2594	5183	456	420
344	2016-09-25	04:03:08	2603	5183	456	5000
345	2016-09-25	04:40:05	2602	5177	456	4300
346	2016-09-25	05:31:38	2602	5177	456	19000
347	2016-09-25	14:30:04	2680	5224	459	840
348	2016-09-26	03:22:53	2771	5317	458	120
349	2016-09-26	03:38:21	2673	5195	460	570
350	2016-09-26	04:56:03	2815	5328	458	350
351	2016-09-26	05:46:28	2665	5328	458	590
352	2016-09-26	06:04:52	2722	5224	460	3700
353	2016-09-26	08:16:15	2722	5264	460	56
354	2016-09-26	12:13:00	2837	5189	458	700
355	2016-09-26	12:58:31	2793	5310	458	2300
356	2016-09-27	19:03:16	2801	5224	458	88
357	2016-09-27	19:11:44	2744	5213	460	280
358	2016-09-27	20:02:59	2736	5235	460	140
359	2016-09-27	20:07:19	2801	5189	458	1600
360	2016-09-27	20:17:19	2736	5189	460	460
361	2016-09-27	20:17:45	2708	5242	460	250
362	2016-09-27	20:19:51	2730	5253	460	81
363	2016-09-27	20:23:49	2801	5149	460	240
364	2016-09-27	20:24:37	2730	5213	460	260
365	2016-09-27	20:53:13	2828	5189	460	250
366	2016-09-27	20:56:21	2678	5299	460	170
367	2016-09-27	21:04:02	2722	5206	460	510
368	2016-09-27	21:48:59	2714	5270	460	97
369	2016-09-27	21:50:36	2695	5253	458	260
370	2016-09-27	22:39:20	2714	5253	460	240
371	2016-09-28	03:13:08	2736	5206	460	600
372	2016-09-28	03:16:09	2881	5270	460	14
373	2016-09-28	03:33:44	2744	5213	460	1500
374	2016-09-28	03:41:50	2687	5328	460	380
375	2016-09-28	04:09:48	2673	5149	458	220
376	2016-09-28	04:26:38	2793	5189	460	100
377	2016-09-28	04:35:04	2730	5235	460	160
378	2016-09-28	05:07:26	2837	5242	458	120
379	2016-09-28	06:03:19	2780	5234	458	200
380	2016-09-28	07:45:01	2788	5149	458	480
381	2016-09-28	13:37:07	2695	5253	460	1800
382	2016-09-28	14:31:02	2837	5178	459	790
383	2016-09-28	14:51:37	2687	5328	460	56
384	2016-09-28	15:13:52	2807	5189	458	980
385	2016-09-28	22:36:22	2722	5224	460	8.7
386	2016-09-28	22:40:31	2665	5310	458	5.9
387	2016-09-28	23:05:46	2651	5270	458	0.78
388	2016-09-28	23:32:00	2614	5191	459	85
389	2016-09-29	04:23:21	2629	5178	458	62
390	2016-09-29	04:38:26	2629	5167	458	1100
391	2016-09-29	04:42:43	2616	5178	458	56
392	2016-09-29	05:57:12	2700	5253	460	47
393	2016-09-29	07:45:15	2722	5224	460	12000
394	2016-09-29	10:22:26	2760	5216	458	350
395	2016-09-29	12:59:44	2758	5189	458	5600
396	2016-09-29	13:40:27	2815	5149	460	310
397	2016-09-29	13:44:17	1285	4260	452	240
398	2016-09-29	14:07:10	2637	5195	458	3100
399	2016-09-29	18:56:25	2710	5206	459	730
400	2016-09-29	19:19:49	2735	5238	458	900
401	2016-09-29	20:54:17	2606	5160	458	400
402	2016-09-29	21:14:53	2730	5213	460	14
403	2016-09-29	21:48:24	2597	5152	460	450
404	2016-09-29	21:58:34	2700	5195	458	490
405	2016-09-30	04:11:28	2665	5149	458	24
406	2016-09-30	04:16:49	2700	5224	460	530
407	2016-09-30	04:31:56	2607	5178	460	7400
408	2016-09-30	04:34:26	2692	5208	458	390
409	2016-09-30	05:50:28	2723	5223	460	49000
410	2016-09-30	05:59:21	2678	5167	460	6200
411	2016-10-04	13:03:22	2736	5224	460	4300
412	2016-10-04	13:29:08	2651	5167	458	210
413	2016-10-04	13:37:23	2673	5206	458	2300
414	2016-10-04	13:37:41	2700	5264	460	1100
415	2016-10-04	15:03:15	2695	5235	458	3700
416	2016-10-04	18:48:56	2708	5206	458	1500
417	2016-10-04	19:11:55	2714	5281	460	270
418	2016-10-04	19:14:42	2643	5167	458	2300
419	2016-10-04	19:44:45	2708	5242	460	2000
420	2016-10-04	19:51:24	2736	5224	460	4600
421	2016-10-04	19:59:54	2714	5224	460	230
422	2016-10-04	20:00:34	2730	5235	460	730
423	2016-10-04	20:00:42	2678	5270	458	3700
424	2016-10-04	20:03:06	2665	5178	460	350
425	2016-10-04	21:21:23	2722	5224	460	360
426	2016-10-04	21:27:22	2687	5288	460	1900
427	2016-10-04	21:30:19	2695	5288	458	31
428	2016-10-04	22:46:39	2687	5242	458	38000
429	2016-10-04	22:57:43	2629	5167	458	1700
430	2016-10-05	03:47:29	2643	5213	460	1400
431	2016-10-05	03:55:10	2687	5281	458	610
432	2016-10-05	04:27:45	2665	5178	458	1400
433	2016-10-05	05:07:15	2673	5167	458	5900
434	2016-10-05	06:01:31	2651	5189	458	47
435	2016-10-05	14:43:48	2629	5149	458	5700
436	2016-10-05	18:15:04	2845	5310	458	6
437	2016-10-05	19:39:58	2736	5224	460	130
438	2016-10-05	19:41:33	2700	5288	460	430
439	2016-10-05	19:45:54	2700	5264	460	90
440	2016-10-05	19:46:14	2700	5242	460	38
441	2016-10-05	20:13:27	2722	5317	458	100
442	2016-10-05	20:14:38	2722	5264	460	330
443	2016-10-05	20:15:07	2678	5299	460	420
444	2016-10-05	20:19:33	2708	5213	460	32
445	2016-10-05	20:30:42	2788	5189	458	10
446	2016-10-05	20:39:07	2730	5242	460	190
447	2016-10-05	21:24:26	2714	5264	460	1000
448	2016-10-05	21:37:15	2730	5213	460	32
449	2016-10-05	21:38:36	2695	5235	460	660
450	2016-10-05	21:50:42	2722	5253	460	450
451	2016-10-05	21:59:07	2687	5195	460	22
452	2016-10-06	02:48:13	2722	5328	458	60
453	2016-10-06	02:55:44	2687	5328	460	82
454	2016-10-06	02:59:04	2700	5253	460	68
455	2016-10-06	03:01:46	2687	5328	460	3600
456	2016-10-06	03:08:37	2708	5213	460	9.1
457	2016-10-06	03:12:58	2708	5281	458	25
458	2016-10-06	03:20:42	2673	5235	458	33
459	2016-10-06	03:24:34	2708	5270	460	830
460	2016-10-06	03:35:48	2621	5224	458	530
461	2016-10-06	03:59:24	2695	5206	460	120
462	2016-10-06	04:10:20	2695	5195	458	740
463	2016-10-06	04:10:38	2673	5270	458	11000
464	2016-10-06	04:10:54	2700	5242	460	6600
465	2016-10-06	04:15:11	2673	5253	458	20000
466	2016-10-06	04:15:58	2700	5224	460	5600
467	2016-10-06	04:23:50	2678	5253	458	1500
468	2016-10-06	04:24:07	2708	5224	460	890
469	2016-10-06	04:54:18	2714	5281	460	570
470	2016-10-06	05:06:34	2673	5167	458	94
471	2016-10-06	05:11:15	2708	5235	460	110
472	2016-10-06	05:33:40	2700	5224	460	600
473	2016-10-06	13:51:10	2528	5178	458	1500
474	2016-10-06	14:35:08	2509	5189	458	5100
475	2016-10-06	16:25:29	2572	5224	458	34
476	2016-10-06	19:23:35	2700	5242	460	340
477	2016-10-06	19:40:15	2700	5242	460	540
478	2016-10-06	19:49:56	2714	5242	460	160
479	2016-10-06	20:12:58	2714	5253	460	3600
480	2016-10-06	20:13:15	2714	5270	460	1800
481	2016-10-06	20:40:07	2779	5328	458	270
482	2016-10-06	21:13:03	2629	5178	458	180
483	2016-10-07	00:48:35	2665	5195	460	13000
484	2016-10-07	01:05:22	2695	5299	460	250
485	2016-10-07	04:16:41	2801	5328	458	970
486	2016-10-07	04:53:31	2708	5242	460	30
487	2016-10-07	05:06:57	2700	5264	460	620
488	2016-10-07	06:07:37	2616	5178	458	84
489	2016-10-07	06:19:13	2700	5264	460	150
490	2016-10-07	06:25:48	1210	4186	487	1200
491	2016-10-07	07:15:56	2687	5213	458	7000
492	2016-10-07	10:31:27	2708	5224	460	230
493	2016-10-07	16:23:25	2837	5288	458	1500
494	2016-10-07	16:24:53	2700	5242	460	12
495	2016-10-07	19:31:05	2700	5288	458	36
496	2016-10-07	19:39:05	2687	5299	460	2500
497	2016-10-07	20:41:19	2708	5253	460	2300
498	2016-10-07	21:41:43	2708	5213	460	8300
499	2016-10-07	22:44:42	2658	5179	458	750
500	2016-10-07	22:55:45	2714	5288	458	16
501	2016-10-07	23:09:13	2658	5186	458	3.1
502	2016-10-07	23:25:59	2752	5189	458	740
503	2016-10-07	23:33:30	2708	5281	460	8500
504	2016-10-07	23:58:03	2714	5213	460	14000
505	2016-10-08	00:39:10	2714	5242	460	220
506	2016-10-08	01:02:35	2692	5235	459	1400
507	2016-10-08	01:03:56	2722	5235	460	340
508	2016-10-08	03:36:49	2693	5222	458	7600
509	2016-10-08	03:48:40	2744	5206	460	30
510	2016-10-08	04:25:23	2808	5352	460	290
511	2016-10-08	04:51:52	2692	5328	459	170
512	2016-10-08	04:55:43	2674	5197	458	9500
513	2016-10-08	05:38:48	2674	5155	458	75
514	2016-10-08	05:39:49	2708	5224	460	9200
515	2016-10-08	06:22:19	2743	5210	458	2900
516	2016-10-08	06:47:55	2678	5189	458	81
517	2016-10-08	08:26:19	2695	5178	458	3000
518	2016-10-08	15:25:34	2643	5189	460	5000
519	2016-10-08	16:10:05	2695	5253	460	1300
520	2016-10-09	02:37:02	2708	5253	458	28
521	2016-10-09	03:13:12	2730	5206	458	2300
522	2016-10-09	03:25:29	2714	5235	460	360
523	2016-10-09	04:10:26	2673	5253	458	4100
524	2016-10-09	04:13:39	2687	5178	460	44
525	2016-10-09	04:15:50	2730	5235	460	18000
526	2016-10-09	04:26:18	2801	5310	458	68
527	2016-10-09	07:48:54	2730	5224	460	71
528	2016-10-09	11:58:28	2673	5253	458	470
529	2016-10-09	12:08:06	2687	5213	458	3200
530	2016-10-09	12:10:19	2687	5270	458	76
531	2016-10-09	14:05:26	2695	5235	460	1400
532	2016-10-09	14:49:50	2700	5253	460	300
533	2016-10-09	15:48:34	2687	5253	458	150
534	2016-10-09	16:06:26	2695	5224	458	2700
535	2016-10-09	16:11:58	2695	5288	460	58000
536	2016-10-09	17:00:37	2563	5213	458	8200
537	2016-10-09	17:04:23	2722	5213	460	270
538	2016-10-09	19:37:21	2687	5206	460	200
539	2016-10-09	20:27:24	2687	5195	460	430
540	2016-10-09	20:45:35	2714	5242	460	12000
541	2016-10-09	20:50:24	2678	5224	458	65
542	2016-10-09	21:44:18	2695	5253	460	6100
543	2016-10-09	21:46:56	2616	5178	458	1300
544	2016-10-09	22:35:08	2722	5213	458	300
545	2016-10-10	01:22:27	2673	5189	458	1400
546	2016-10-10	02:28:27	2629	5167	458	72
547	2016-10-10	04:03:35	2616	5189	458	200
548	2016-10-10	04:40:47	2695	5195	460	140
549	2016-10-10	05:03:36	2536	5167	458	4200
550	2016-10-10	12:12:45	2695	5235	458	120
551	2016-10-10	12:12:57	2708	5317	458	660
552	2016-10-10	12:21:19	2673	5189	460	120
553	2016-10-10	14:01:56	1173	4442	465	7800
554	2016-10-10	15:32:22	2621	5178	458	1800
555	2016-10-10	15:46:26	2659	5178	458	110
556	2016-10-10	15:46:57	2659	5195	460	680
557	2016-10-10	18:07:47	2730	5224	460	5600
558	2016-10-10	20:19:07	2708	5167	458	47
559	2016-10-10	20:31:44	2730	5167	458	1000
560	2016-10-10	20:40:40	2736	5189	458	430
561	2016-10-10	21:32:33	2722	5206	460	2200
562	2016-10-10	22:01:13	2771	5189	458	98
563	2016-10-10	22:10:15	2744	5178	458	120
564	2016-10-10	22:16:31	2659	5178	460	140
565	2016-10-10	22:50:32	2779	5160	460	140
566	2016-10-10	23:08:03	2752	5178	458	32
567	2016-10-11	00:02:15	2631	5166	458	470
568	2016-10-11	03:15:55	2621	5195	460	990
569	2016-10-11	03:18:50	2708	5167	458	400
570	2016-10-11	03:41:30	2710	5273	458	970
571	2016-10-11	03:42:39	2764	5178	458	180
572	2016-10-11	04:01:39	2602	5178	458	2200
573	2016-10-11	04:37:23	2629	5189	458	16
574	2016-10-11	04:50:29	2621	5178	458	920
575	2016-10-11	04:59:45	2714	5224	460	90
576	2016-10-11	07:41:53	2770	5383	460	880
577	2016-10-11	08:11:55	2665	5149	460	690
578	2016-10-11	12:22:58	2673	5149	458	270000
579	2016-10-11	12:24:15	2667	5131	458	120
580	2016-10-11	13:06:56	2783	5178	458	7400
581	2016-10-11	13:16:28	2695	5213	458	660
582	2016-10-11	13:56:24	2714	5213	458	960
583	2016-10-11	13:59:55	2700	5288	460	170
584	2016-10-11	14:04:39	2631	5165	458	90
585	2016-10-11	16:19:37	2621	5195	458	430
586	2016-10-11	16:45:53	2687	5160	460	390
587	2016-10-11	16:54:14	2714	5167	458	47
588	2016-10-11	20:13:52	2687	5213	458	2500
589	2016-10-11	21:31:18	2722	5264	458	16
590	2016-10-12	02:55:38	2708	5189	458	210
591	2016-10-12	05:34:39	2678	5328	460	70
592	2016-10-12	05:36:05	2678	5253	460	230
593	2016-10-12	05:43:10	2722	5178	460	130
594	2016-10-12	07:11:40	2687	5224	458	8800
595	2016-10-12	07:12:25	2678	5235	458	91000
596	2016-10-12	07:14:03	2687	5264	460	120
597	2016-10-12	07:56:30	2695	5235	458	1000
598	2016-10-12	14:59:57	2700	5224	460	110
599	2016-10-12	19:54:32	2714	5253	460	420
600	2016-10-12	21:12:46	2730	5224	458	22
601	2016-10-12	23:00:02	2700	5264	460	760
602	2016-10-13	03:42:33	2637	5167	458	27
603	2016-10-13	03:46:14	2678	5224	458	350
604	2016-10-13	04:10:18	2678	5235	460	1900
605	2016-10-13	05:32:27	2602	5178	458	290
606	2016-10-13	06:10:09	2722	5299	458	210
607	2016-10-13	06:14:31	2714	5235	460	2000
608	2016-10-13	06:40:53	2678	5213	460	140
609	2016-10-13	06:57:12	2678	5206	458	960
610	2016-10-13	18:51:26	2714	5288	458	92
611	2016-10-13	19:08:50	2580	5195	458	2200
612	2016-10-13	19:38:36	2665	5253	458	120
613	2016-10-13	20:22:43	2687	5328	460	870
614	2016-10-13	20:33:31	2678	5195	460	640
615	2016-10-13	20:33:56	2722	5206	458	78
616	2016-10-13	20:59:26	2678	5178	458	120
617	2016-10-13	21:12:35	2643	5189	458	110
618	2016-10-14	00:26:00	2708	5160	458	350
619	2016-10-14	02:36:12	2558	5264	460	1600
620	2016-10-14	03:15:17	2736	5206	460	350
621	2016-10-14	03:26:45	2659	5281	458	4500
622	2016-10-14	03:31:57	2700	5264	460	600
623	2016-10-14	04:17:37	2700	5270	460	240
624	2016-10-14	05:20:18	2700	5206	458	410
625	2016-10-14	05:23:34	2678	5328	460	630
626	2016-10-14	05:27:48	1175	4292	470	270
627	2016-10-14	06:02:28	2714	5167	458	210
628	2016-10-14	06:04:29	2687	5206	460	370
629	2016-10-14	06:36:40	2629	5195	458	390
630	2016-10-14	07:34:08	2649	5206	458	66
631	2016-10-14	07:47:11	2659	5242	458	770
632	2016-10-14	07:54:47	2708	5195	458	960
633	2016-10-14	08:03:41	2651	5167	460	4100
634	2016-10-14	18:46:21	2614	5189	458	9800
635	2016-10-15	15:55:33	2509	5189	458	16000
636	2016-10-15	20:03:11	2643	5253	458	19000
637	2016-10-16	01:54:31	2580	5213	460	350
638	2016-10-16	03:57:03	2651	5167	458	190
639	2016-10-16	03:59:29	2687	5224	458	1200
640	2016-10-16	04:10:44	2629	5149	458	430
641	2016-10-16	04:24:16	2678	5195	458	570
642	2016-10-16	04:24:49	2665	5178	458	220
643	2016-10-16	05:32:12	2637	5167	458	260
644	2016-10-16	05:33:33	2687	5213	458	1900
645	2016-10-16	05:33:46	2673	5195	460	69
646	2016-10-16	06:50:00	2637	5178	458	3000
647	2016-10-16	06:53:14	2659	5178	458	76
648	2016-10-16	08:02:17	2643	5178	458	210
649	2016-10-16	08:52:19	2637	5253	458	8300
650	2016-10-16	08:53:08	2637	5178	458	730
651	2016-10-16	13:51:54	2651	5206	458	560
652	2016-10-16	15:52:06	1183	4434	452	5800
653	2016-10-16	20:53:14	2621	5195	458	2500
654	2016-10-16	23:27:11	2629	5264	458	3600
655	2016-10-17	02:26:21	2673	5206	458	98
656	2016-10-17	03:08:00	2678	5328	460	2800
657	2016-10-17	03:31:24	2722	5328	458	32
658	2016-10-17	03:40:54	2651	5195	458	1100
659	2016-10-17	03:49:22	2687	5328	460	2500
660	2016-10-17	04:13:32	2687	5189	458	270
661	2016-10-17	04:16:56	2714	5213	458	180
662	2016-10-17	04:18:07	2695	5206	458	350
663	2016-10-17	04:45:26	2616	5167	458	360
664	2016-10-17	04:51:20	2700	5317	460	56
665	2016-10-17	05:02:32	2700	5264	460	2000
666	2016-10-17	05:06:53	2687	5253	458	360
667	2016-10-17	05:49:37	2637	5189	458	15000
668	2016-10-17	05:59:19	2678	5224	458	56
669	2016-10-17	06:02:12	2607	5178	458	1200
670	2016-10-17	06:07:27	2673	5178	458	270
671	2016-10-17	06:59:31	2695	5253	458	1100
672	2016-10-17	09:07:16	2629	5195	458	9300
673	2016-10-17	10:25:00	2673	5242	458	850
674	2016-10-17	11:09:49	2744	5206	460	840
675	2016-10-17	11:54:44	2643	5195	458	430
676	2016-10-17	13:05:55	2621	5253	458	850
677	2016-10-17	13:24:43	2714	5235	460	530
678	2016-10-17	13:38:57	2643	5195	458	700
679	2016-10-17	17:40:07	2687	5224	458	1700
680	2016-10-17	18:41:29	2659	5160	458	170
681	2016-10-17	19:16:18	2678	5206	458	140
682	2016-10-17	19:30:17	2659	5149	460	160
683	2016-10-17	22:04:16	2673	5224	458	270
684	2016-10-18	03:05:01	2687	5264	458	1100
685	2016-10-18	03:24:13	2714	5224	460	400
686	2016-10-18	03:25:42	2687	5264	460	28
687	2016-10-18	03:28:44	2659	5189	460	1800
688	2016-10-18	04:17:26	2651	5178	458	210
689	2016-10-18	04:50:04	2678	5235	460	500
690	2016-10-18	05:20:20	2659	5178	458	420
691	2016-10-18	08:22:49	2687	5299	460	130
692	2016-10-18	09:07:33	2651	5160	458	60
693	2016-10-18	09:15:22	2678	5206	458	23000
694	2016-10-18	09:40:48	2651	5195	458	230
695	2016-10-18	15:01:05	2700	5264	458	4200
696	2016-10-18	15:14:56	2687	5242	460	1100
697	2016-10-18	15:43:22	2673	5178	458	6700
698	2016-10-18	16:18:20	1144	4172	470	3800
699	2016-10-18	16:34:00	2687	5242	458	1500
700	2016-10-18	17:10:58	2678	5189	458	220
701	2016-10-18	17:19:32	2637	5167	458	22000
702	2016-10-18	19:38:29	2687	5235	458	55
703	2016-10-18	19:48:36	2687	5224	460	200
704	2016-10-18	20:26:34	2594	5178	458	220
705	2016-10-18	20:30:43	2695	5281	460	160
706	2016-10-18	20:45:14	2665	5224	458	28000
707	2016-10-18	20:45:48	2659	5206	458	750
708	2016-10-18	20:46:14	2665	5206	458	1700
709	2016-10-18	20:50:19	2678	5206	458	7200
710	2016-10-18	23:09:34	2665	5167	458	2700
711	2016-10-18	23:18:17	2678	5281	458	260
712	2016-10-18	23:41:03	2580	5178	458	100
713	2016-10-19	01:52:14	2695	5206	458	670
714	2016-10-19	02:43:59	2621	5253	458	240
715	2016-10-19	02:49:24	2714	5270	460	100
716	2016-10-19	04:06:38	2779	5317	458	71
717	2016-10-19	05:46:45	2602	5178	458	560
718	2016-10-19	08:10:05	2607	5195	458	1100
719	2016-10-19	08:43:33	2695	5242	460	720
720	2016-10-19	09:50:23	2637	5178	458	230
721	2016-10-19	10:57:37	2637	5195	458	17000
722	2016-10-19	11:12:59	2752	5195	460	2900
723	2016-10-19	13:34:53	2629	5167	458	160
724	2016-10-19	13:39:37	2673	5213	458	580
725	2016-10-19	13:40:25	2695	5224	458	220
726	2016-10-19	13:42:21	2700	5224	458	140
727	2016-10-19	13:45:37	2629	5167	458	38000
728	2016-10-19	13:48:26	2687	5253	458	24
729	2016-10-19	19:05:25	2708	5167	458	1400
730	2016-10-19	19:40:16	2700	5167	460	410
731	2016-10-19	20:52:16	2629	5160	458	34
732	2016-10-19	21:48:53	2722	5224	460	220
733	2016-10-19	23:23:45	2661	5211	458	300
734	2016-10-20	01:06:44	2621	5149	458	9100
735	2016-10-20	04:21:33	2650	5143	458	440
736	2016-10-20	04:35:02	2605	5197	458	950
737	2016-10-20	04:36:27	2761	5188	458	140
738	2016-10-20	04:36:45	2695	5160	458	420
739	2016-10-20	04:36:52	2628	5176	458	58
740	2016-10-20	04:40:22	2639	5113	458	430
741	2016-10-20	04:54:02	2687	5160	460	60
742	2016-10-20	05:00:23	2625	5174	458	170
743	2016-10-20	05:15:12	2695	5149	458	180
744	2016-10-20	05:42:48	2659	5167	458	140
745	2016-10-20	12:12:30	2687	5242	458	170
746	2016-10-20	13:07:57	2687	5195	460	3800
747	2016-10-20	19:57:03	2659	5206	458	3400
748	2016-10-20	20:44:17	2509	5189	458	920
749	2016-10-20	21:06:03	2678	5189	458	5100
750	2016-10-20	22:46:27	2714	5264	460	280
751	2016-10-21	02:14:07	2607	5178	458	52
752	2016-10-21	06:50:32	2659	5149	458	360
753	2016-10-21	13:38:20	2673	5178	458	400
754	2016-10-21	14:24:07	2643	5167	458	300
755	2016-10-21	14:31:07	2673	5206	458	80000
756	2016-10-21	14:31:41	2687	5189	458	530
757	2016-10-21	14:34:01	2700	5270	458	15
758	2016-10-21	15:18:19	2637	5149	458	3300
759	2016-10-21	17:16:28	2673	5224	458	140
760	2016-10-21	18:44:29	2687	5195	458	1000
761	2016-10-21	19:07:44	2637	5149	458	640
762	2016-10-21	19:28:14	2714	5253	460	63
763	2016-10-21	20:22:20	2665	5224	458	460
764	2016-10-21	20:27:50	2687	5281	458	150
765	2016-10-21	21:14:41	2629	5235	458	29000
766	2016-10-21	21:18:21	2687	5270	460	38
767	2016-10-22	03:27:34	2673	5224	458	200
768	2016-10-22	03:37:25	2678	5235	460	23
769	2016-10-22	03:56:18	2629	5149	458	3200
770	2016-10-22	06:19:22	2708	5242	460	540
771	2016-10-22	13:42:11	2509	5189	458	6800
772	2016-10-22	14:07:41	2509	5189	458	79000
773	2016-10-22	14:43:38	2509	5189	458	7700
774	2016-10-22	19:04:12	2673	5242	458	980
775	2016-10-22	19:05:33	2629	5206	458	38
776	2016-10-22	19:51:05	2659	5167	458	720
777	2016-10-22	20:01:27	2695	5206	458	210
778	2016-10-22	21:07:26	2637	5149	460	290
779	2016-10-23	03:59:17	2651	5149	460	120
780	2016-10-23	05:05:54	2637	5189	458	52
781	2016-10-23	06:08:27	2687	5264	458	30
782	2016-10-23	06:30:12	2687	5253	458	1100
783	2016-10-23	11:31:06	2643	5270	458	1800
784	2016-10-23	13:30:08	2708	5264	458	170
785	2016-10-23	13:36:28	2659	5189	458	2100
786	2016-10-23	19:06:53	2572	5235	458	680
787	2016-10-23	19:09:59	2495	5162	458	94
788	2016-10-23	19:22:54	2580	5242	458	82
789	2016-10-23	19:27:48	2643	5213	458	1200
790	2016-10-23	19:29:27	2659	5189	458	4500
791	2016-10-23	19:39:50	2678	5213	458	9400
792	2016-10-23	19:40:38	2722	5224	460	680
793	2016-10-23	19:56:48	2621	5242	458	1500
794	2016-10-23	20:11:14	2616	5160	458	210
795	2016-10-23	20:26:57	2643	5235	458	25000
796	2016-10-24	03:24:50	2621	5167	458	500
797	2016-10-24	04:13:55	2621	5178	458	560
798	2016-10-24	05:10:11	2607	5235	458	380
799	2016-10-24	08:45:41	2673	5195	458	200
800	2016-10-24	14:54:11	2651	5167	458	790
801	2016-10-24	14:57:05	2651	5178	460	29000
802	2016-10-24	23:16:36	2637	5206	458	8500
803	2016-10-24	23:17:24	2665	5167	458	140
804	2016-10-24	23:27:48	2687	5224	458	91
805	2016-10-25	00:08:07	2643	5160	458	5800
806	2016-10-25	01:15:27	2629	5178	458	330
807	2016-10-25	03:33:46	2673	5206	458	220
808	2016-10-25	03:37:35	2673	5235	458	210
809	2016-10-25	03:46:23	2629	5178	458	3100
810	2016-10-25	04:03:40	2665	5178	458	9500
811	2016-10-25	04:04:10	2616	5167	458	140
812	2016-10-25	04:05:43	2651	5167	458	330
813	2016-10-25	04:06:56	2637	5195	458	160
814	2016-10-25	04:08:03	2678	5235	458	370
815	2016-10-25	04:09:21	2616	5178	458	100
816	2016-10-25	04:31:05	2629	5167	458	380
817	2016-10-25	04:35:53	2651	5189	460	77000
818	2016-10-25	04:49:34	2607	5178	458	200
819	2016-10-25	05:04:02	2637	5149	458	6300
820	2016-10-25	11:36:21	2678	5328	460	280
821	2016-10-25	13:03:43	2687	5288	460	160
822	2016-10-25	13:58:17	2687	5242	458	41
823	2016-10-25	15:37:14	2678	5235	458	630
824	2016-10-25	16:05:27	2665	5213	460	260
825	2016-10-25	17:42:50	2722	5264	460	49
826	2016-10-25	17:45:14	2687	5253	460	2600
827	2016-10-25	18:53:18	2744	5206	460	40
828	2016-10-25	19:19:04	2678	5160	458	2200
829	2016-10-25	22:34:58	2602	5178	458	610
830	2016-10-25	23:39:36	2643	5160	458	980
831	2016-10-26	01:03:14	2700	5242	458	120
832	2016-10-26	03:04:02	2687	5242	460	200
833	2016-10-26	03:33:12	2665	5206	458	740
834	2016-10-26	03:57:29	2678	5242	458	400
835	2016-10-26	04:10:44	2700	5242	458	360
836	2016-10-26	04:44:01	2695	5242	458	82
837	2016-10-26	04:59:33	2714	5213	460	270
838	2016-10-26	05:29:41	2700	5281	460	100
839	2016-10-26	05:32:00	2673	5224	458	87
840	2016-10-26	06:46:44	2629	5160	460	1000
841	2016-10-26	07:00:54	2629	5167	458	23000
842	2016-10-26	07:09:41	2673	5206	458	290
843	2016-10-26	14:49:36	2736	5235	460	360
844	2016-10-26	15:20:35	2641	5186	458	0.18
845	2016-10-26	15:44:35	2695	5224	460	30000
846	2016-10-26	16:30:44	2714	5242	460	130
847	2016-10-26	16:38:03	2700	5167	458	78
848	2016-10-26	17:08:21	2714	5242	460	9800
849	2016-10-26	17:36:28	2678	5195	458	1000
850	2016-10-26	17:58:18	2678	5178	460	4300
851	2016-10-26	18:56:45	2555	5165	459	24000
852	2016-10-26	19:51:44	2563	5213	460	21000
853	2016-10-26	23:58:42	2651	5206	458	32000
854	2016-10-27	01:36:59	2659	5189	458	420
855	2016-10-27	02:35:10	2621	5195	458	93
856	2016-10-27	05:04:36	2659	5160	458	860
857	2016-10-27	05:28:24	2585	5178	458	390
858	2016-10-27	06:11:08	2572	5213	460	89000
859	2016-10-27	06:37:03	2616	5149	458	680
860	2016-10-27	07:07:10	2643	5167	458	1400
861	2016-10-27	07:07:40	2651	5167	458	2300
862	2016-10-27	10:12:54	2665	5189	458	2700
863	2016-10-27	15:57:09	2594	5178	458	190
864	2016-10-27	16:24:03	2629	5178	458	1100
865	2016-10-27	16:29:26	2629	5189	458	880
866	2016-10-27	16:39:20	2651	5189	458	100
867	2016-10-27	16:43:04	2779	5189	458	520
868	2016-10-27	18:41:23	2585	5189	458	5000
869	2016-10-27	19:30:25	2659	5160	458	19
870	2016-10-27	19:30:36	2695	5224	458	1500
871	2016-10-28	02:59:18	2673	5270	458	960
872	2016-10-28	03:53:37	2563	5242	460	320
873	2016-10-28	04:15:12	2695	5253	460	440
874	2016-10-28	05:33:11	2563	5224	458	340
875	2016-10-28	05:34:02	2665	5178	458	160
876	2016-10-28	12:41:50	2708	5224	460	7800
877	2016-10-28	13:40:27	2687	5195	460	1400
878	2016-10-28	13:51:40	2708	5253	460	35000
879	2016-10-28	16:47:57	2492	5189	458	420
880	2016-10-28	16:49:56	2514	5178	458	510
881	2016-10-28	19:26:58	2679	5184	458	300
882	2016-10-28	19:45:36	2637	5149	460	6400
883	2016-10-28	20:00:50	2700	5167	458	570
884	2016-10-28	20:10:58	2607	5178	458	1400
885	2016-10-28	21:58:48	2695	5149	458	97
886	2016-10-28	22:05:45	2637	5178	458	29000
887	2016-10-28	23:18:36	2572	5178	458	1100
888	2016-10-28	23:50:59	2687	5149	458	6600
889	2016-10-29	05:09:47	2643	5160	458	8200
890	2016-10-29	05:12:38	2637	5149	458	54000
891	2016-10-29	07:11:20	2672	5166	458	410
892	2016-10-29	08:43:41	2594	5178	458	1800
893	2016-10-29	08:50:40	2594	5178	458	900
894	2016-10-29	14:18:28	2665	5270	458	64
895	2016-10-29	15:02:21	2509	5189	458	7500
896	2016-10-29	15:28:47	2687	5189	458	760
897	2016-10-29	15:38:02	2509	5189	458	14000
898	2016-10-29	18:36:43	2651	5178	458	740
899	2016-10-29	18:51:51	2665	5224	460	2300
900	2016-10-29	19:00:10	2651	5235	458	19000
901	2016-10-29	19:13:13	2678	5195	458	190
902	2016-10-29	19:33:18	2594	5178	458	5100
903	2016-10-29	19:36:54	2629	5178	458	7000
904	2016-10-29	20:18:29	2673	5178	458	190
905	2016-10-29	20:21:50	2665	5178	458	210
906	2016-10-29	20:36:13	2665	5189	460	2200
907	2016-10-29	21:01:40	2621	5178	458	21000
908	2016-10-29	22:44:08	2700	5270	458	54
909	2016-10-29	23:39:44	2629	5195	458	8200
910	2016-10-30	00:07:31	2585	5178	458	3800
911	2016-10-30	03:36:40	2695	5224	458	1800
912	2016-10-30	04:16:25	2659	5178	460	690
913	2016-10-30	15:07:29	2695	5299	460	110
914	2016-10-30	16:29:04	2594	5178	458	300
915	2016-10-30	18:57:00	2651	5206	458	22000
916	2016-10-30	19:30:34	2402	5147	454	800
917	2016-10-30	20:02:53	2585	5167	458	580
918	2016-10-30	20:05:15	2687	5235	460	140
919	2016-10-30	20:09:24	2602	5178	458	220
920	2016-10-30	20:33:42	2527	5178	454	34
921	2016-10-30	20:36:26	2479	5135	454	170
922	2016-10-30	21:21:21	2599	5179	457	6300
923	2016-10-30	21:45:44	2621	5160	458	400
924	2016-10-30	22:57:32	2514	5189	458	4.1
925	2016-10-30	23:50:31	2498	5170	454	320
926	2016-10-30	23:51:56	2474	5185	479	460
927	2016-10-31	02:43:52	2549	5200	459	4700
928	2016-10-31	03:02:25	2609	5179	458	1200
929	2016-10-31	03:07:33	2602	5178	458	180
930	2016-10-31	03:34:02	2594	5178	458	360
931	2016-10-31	03:54:11	2629	5189	458	2400
932	2016-10-31	04:19:44	2616	5149	458	120
933	2016-10-31	04:42:47	2659	5206	460	2900
934	2016-10-31	05:30:18	2651	5160	458	7400
935	2016-10-31	07:10:56	2708	5160	458	2100
936	2016-10-31	08:48:47	2637	5167	458	1400
937	2016-10-31	11:06:34	2659	5189	458	360
938	2016-10-31	14:00:45	2580	5160	458	80000
939	2016-10-31	14:16:40	2616	5189	458	0.96
940	2016-10-31	16:22:17	2563	5160	460	9100
941	2016-10-31	16:24:49	2563	5149	460	540
942	2016-10-31	18:25:22	2665	5178	458	1500
943	2016-10-31	19:32:05	2643	5178	458	1900
944	2016-10-31	21:24:57	2678	5195	458	380
945	2016-11-01	01:25:31	2700	5160	458	780
946	2016-11-01	02:25:04	2550	5206	460	370
947	2016-11-01	03:05:50	2678	5167	460	770
948	2016-11-01	05:07:23	2637	5206	458	800
949	2016-11-01	08:49:08	2643	5195	460	620
950	2016-11-01	11:10:03	2665	5189	458	2200
951	2016-11-01	12:34:27	2695	5235	460	860
952	2016-11-01	13:31:38	2621	5195	458	3000
953	2016-11-01	14:32:03	2616	5167	458	870
954	2016-11-01	14:33:57	2651	5189	458	24000
955	2016-11-01	15:42:15	2637	5178	458	20000
956	2016-11-01	15:49:06	2673	5189	458	2100
957	2016-11-01	20:11:47	2621	5178	458	4300
958	2016-11-01	21:07:57	2607	5160	458	1300
959	2016-11-02	00:12:48	2646	5179	458	4800
960	2016-11-02	00:25:37	2594	5149	458	280
961	2016-11-02	03:46:41	2651	5206	458	8100
962	2016-11-02	04:03:55	2673	5206	458	30000
963	2016-11-02	04:41:23	2651	5195	458	620
964	2016-11-02	07:09:05	2633	5179	458	1400
965	2016-11-02	07:28:51	2625	5186	458	610
966	2016-11-02	07:32:21	2563	5167	458	7900
967	2016-11-02	08:17:19	2616	5160	458	410
968	2016-11-02	17:02:45	2621	5167	458	480
969	2016-11-02	20:34:20	2651	5149	458	38000
970	2016-11-02	20:40:04	2602	5178	458	4300
971	2016-11-02	21:27:54	2603	5182	458	480
972	2016-11-02	21:46:54	2602	5178	458	1300
973	2016-11-03	03:59:58	2688	5179	458	360
974	2016-11-03	04:02:59	2673	5178	458	4600
975	2016-11-03	04:59:02	2595	5181	458	81
976	2016-11-03	05:01:08	2580	5206	460	1300
977	2016-11-03	05:27:12	2665	5178	458	9800
978	2016-11-03	05:33:52	2572	5224	460	890
979	2016-11-03	05:43:03	2621	5206	458	3800
980	2016-11-03	06:15:00	2616	5154	458	310
981	2016-11-03	07:27:00	2687	5149	458	280
982	2016-11-03	07:48:10	2599	5158	458	330
983	2016-11-03	09:45:17	2714	5270	460	420
984	2016-11-03	19:09:42	2621	5167	458	2800
985	2016-11-03	20:32:24	2602	5178	458	720
986	2016-11-03	21:06:31	2659	5160	460	350
987	2016-11-03	21:40:48	1199	4406	454	340
988	2016-11-04	04:07:46	2752	5213	460	1100
989	2016-11-04	05:17:56	2616	5178	458	400
990	2016-11-04	05:49:53	2594	5178	458	220
991	2016-11-04	05:50:23	2572	5224	460	79000
992	2016-11-04	06:38:36	2673	5310	458	680
993	2016-11-04	07:14:16	2558	5235	458	530
994	2016-11-04	14:19:11	2629	5178	458	11000
995	2016-11-04	14:19:21	2629	5167	458	8200
996	2016-11-04	15:21:41	2665	5167	458	7200
997	2016-11-04	15:49:03	2643	5178	458	210
998	2016-11-04	15:54:29	2695	5206	458	140
999	2016-11-04	16:05:29	2665	5242	458	7100
1000	2016-11-04	16:13:02	2687	5242	458	46000
1001	2016-11-04	17:10:59	2665	5299	458	1900
1002	2016-11-04	21:03:02	2616	5195	458	810
1003	2016-11-04	21:08:42	2637	5167	458	620
1004	2016-11-05	03:39:59	2637	5213	458	15000
1005	2016-11-05	05:02:58	2594	5178	458	450
1006	2016-11-05	05:19:40	2621	5195	458	1500
1007	2016-11-05	05:56:23	2629	5206	458	2300
1008	2016-11-05	07:41:45	2602	5178	458	510
1009	2016-11-05	08:06:55	2616	5195	458	52000
1010	2016-11-05	09:04:19	2509	5189	458	1200
1011	2016-11-05	09:17:22	2602	5149	458	320
1012	2016-11-05	11:08:53	2687	5189	460	9000
1013	2016-11-05	18:51:31	2616	5167	458	7500
1014	2016-11-05	19:08:38	2629	5195	458	340
1015	2016-11-05	19:30:00	2621	5149	458	1200
1016	2016-11-05	21:21:17	2700	5242	458	4500
1017	2016-11-05	21:33:38	2616	5167	458	1100
1018	2016-11-05	23:47:43	2621	5206	458	620
1019	2016-11-06	01:26:42	2616	5224	458	47000
1020	2016-11-06	06:04:22	2651	5224	458	460
1021	2016-11-06	06:19:27	2580	5206	458	540
1022	2016-11-06	10:17:50	2621	5160	458	2300
1023	2016-11-07	00:36:52	2406	5097	460	560
1024	2016-11-07	07:46:48	2545	5124	461	770
1025	2016-11-07	14:01:09	2658	5311	461	46000
1026	2016-11-07	14:19:21	2597	5184	461	350
1027	2016-11-07	14:19:29	2708	5162	459	770
1028	2016-11-07	18:39:20	2708	5197	460	7300
1029	2016-11-07	18:44:18	2666	5192	460	200
1030	2016-11-07	19:41:59	2587	5229	460	58000
1031	2016-11-07	20:43:25	2597	5229	460	570
1032	2016-11-07	20:57:43	2623	5229	460	390
1033	2016-11-07	23:10:52	2581	5197	460	4900
1034	2016-11-08	02:28:55	2519	5086	460	1600
1035	2016-11-08	02:45:47	2460	5095	460	440
1036	2016-11-08	03:10:04	2630	5178	457	6700
1037	2016-11-08	07:55:18	2486	5072	460	5900
1038	2016-11-08	09:21:13	2571	5146	460	21000
1039	2016-11-08	13:11:59	2581	5229	460	1300
1040	2016-11-08	17:34:57	2505	5175	460	3300
1041	2016-11-08	17:35:27	2568	5175	460	32000
1042	2016-11-08	17:35:43	2505	5175	460	350
1043	2016-11-08	17:36:02	2559	5175	460	1400
1044	2016-11-08	19:04:36	2607	5178	457	510
1045	2016-11-08	19:15:19	2587	5229	460	170
1046	2016-11-08	20:16:01	2437	5170	454	3000
1047	2016-11-09	00:09:37	2708	5229	460	180
1048	2016-11-09	02:30:11	2496	5169	460	150
1049	2016-11-09	03:03:36	2496	5169	460	7000
1050	2016-11-09	03:04:48	2545	5229	460	1700
1051	2016-11-09	03:24:28	2503	5178	460	170
1052	2016-11-09	04:00:40	2587	5229	460	7300
1053	2016-11-09	04:05:22	2623	5169	460	18000
1054	2016-11-09	07:01:23	2571	5229	460	2000
1055	2016-11-09	07:52:42	2581	5229	460	4100
1056	2016-11-09	07:54:55	2545	5229	460	1300
1057	2016-11-09	12:58:00	1228	4524	407	2600
1058	2016-11-09	13:30:44	2545	5106	460	3800
1059	2016-11-09	14:00:18	2787	5192	459	14000
1060	2016-11-09	21:29:27	2529	5146	460	19000
1061	2016-11-09	21:34:05	2503	5169	460	470
1062	2016-11-09	23:12:57	2597	5229	460	1600
1063	2016-11-10	03:08:50	2613	5220	460	840
1064	2016-11-10	03:24:37	2607	5229	460	3000
1065	2016-11-10	03:37:00	2561	5132	460	360
1066	2016-11-10	04:55:14	2555	5229	460	1400
1067	2016-11-10	05:51:00	2496	5132	460	440
1068	2016-11-10	11:48:43	2519	5215	460	250
1069	2016-11-10	12:42:17	2587	5160	457	3600
1070	2016-11-10	12:47:33	2736	5229	459	19000
1071	2016-11-10	19:21:43	2656	5206	460	380
1072	2016-11-10	20:45:15	2613	5155	461	87000
1073	2016-11-10	20:46:10	2529	5143	461	140
1074	2016-11-10	20:51:11	2623	5155	457	42000
1075	2016-11-10	21:00:35	2555	5154	461	98000
1076	2016-11-11	06:06:55	2571	5123	460	1400
1077	2016-11-11	10:48:37	2476	5132	460	930
1078	2016-11-11	14:45:10	2587	5229	460	2400
1079	2016-11-11	20:25:53	2587	5146	457	930
1080	2016-11-12	02:49:02	2623	5229	460	560
1081	2016-11-12	02:57:43	2656	5169	457	7900
1082	2016-11-12	03:20:08	2571	5229	460	520
1083	2016-11-12	03:51:29	2682	5183	460	1000
1084	2016-11-12	05:39:00	2650	5206	460	1500
1085	2016-11-12	06:28:26	2581	5197	460	350
1086	2016-11-12	06:36:07	2623	5229	460	4600
1087	2016-11-12	07:55:36	2544	5222	460	2300
1088	2016-11-12	09:56:14	2640	5160	457	2700
1089	2016-11-12	12:02:54	2460	5160	457	460
1090	2016-11-12	19:15:16	2555	5155	457	68
1091	2016-11-12	19:16:22	2666	5178	460	5700
1092	2016-11-12	19:34:43	2519	5178	457	64000
1093	2016-11-12	20:37:17	2666	5172	460	1200
1094	2016-11-12	20:47:50	2545	5183	460	14000
1095	2016-11-12	20:56:56	2676	5183	460	1800
1096	2016-11-12	21:51:24	2531	5131	460	180
1097	2016-11-12	22:37:32	2490	5103	460	170
1098	2016-11-12	22:59:58	2659	5254	457	4500
1099	2016-11-12	23:04:03	2513	5172	460	130
1100	2016-11-13	00:08:47	2555	5109	460	240
1101	2016-11-13	01:08:15	2591	5169	461	21000
1102	2016-11-13	04:52:59	2692	5169	460	930
1103	2016-11-13	05:04:42	2561	5109	460	65
1104	2016-11-13	06:05:30	2555	5146	460	370
1105	2016-11-13	11:47:38	2555	5229	460	2600
1106	2016-11-13	21:26:25	2587	5229	460	3100
1107	2016-11-13	21:31:46	2581	5220	460	33000
1108	2016-11-13	22:46:11	2607	5132	460	64000
1109	2016-11-14	02:37:33	2630	5137	457	2600
1110	2016-11-14	03:48:39	2581	5220	460	280
1111	2016-11-14	04:48:18	2587	5192	457	9900
1112	2016-11-14	04:54:16	2607	5123	460	68000
1113	2016-11-14	09:10:51	2650	5192	459	70
1114	2016-11-14	09:25:16	2607	5203	461	120
1115	2016-11-14	12:39:38	2613	5109	460	2400
1116	2016-11-14	14:12:21	2519	5229	460	2800
1117	2016-11-14	14:13:58	2519	5072	460	7800
1118	2016-11-14	15:15:45	2496	5072	460	2600
1119	2016-11-14	16:12:50	2539	5132	457	120
1120	2016-11-14	16:12:56	2587	5229	460	160
1121	2016-11-14	20:25:05	2571	5143	461	5100
1122	2016-11-14	23:01:53	2793	5192	457	2000
1123	2016-11-15	07:27:07	2555	5203	461	3300
1124	2016-11-15	12:50:13	2613	5155	460	2300
1125	2016-11-15	13:31:07	2513	5197	460	1500
1126	2016-11-15	21:44:45	2587	5229	460	930
1127	2016-11-15	21:46:32	2392	5146	460	4000
1128	2016-11-15	22:32:32	2607	5184	461	120
1129	2016-11-16	02:56:14	2571	5229	460	2500
1130	2016-11-16	09:12:09	2581	5160	460	1300
1131	2016-11-16	09:32:22	2539	5197	460	1300
1132	2016-11-16	15:52:03	2587	5143	461	7200
1133	2016-11-17	03:55:25	2597	5137	460	2000
1134	2016-11-17	19:31:30	2555	5124	461	260
1135	2016-11-18	01:33:33	2571	5169	460	790
1136	2016-11-18	04:20:03	2571	5192	461	570
1137	2016-11-18	05:40:49	2623	5162	461	140
1138	2016-11-18	09:13:48	2569	5164	460	180
1139	2016-11-18	09:52:25	2587	5203	461	120
1140	2016-11-18	10:21:24	2640	5183	457	120
1141	2016-11-19	14:07:38	2499	5160	461	160
1142	2016-11-20	09:33:46	2597	5137	460	660
1143	2016-11-20	19:24:35	2587	5229	460	5.6
1144	2016-11-21	02:55:47	2597	5192	457	200
1145	2016-11-21	03:49:00	2529	5220	460	85
1146	2016-11-21	04:14:33	2587	5136	461	7.9
1147	2016-11-21	05:06:43	2529	5160	460	38
1148	2016-11-21	10:17:56	2613	5203	461	590
1149	2016-11-21	11:39:57	2571	5229	460	73
1150	2016-11-21	11:44:41	2545	5229	460	180
1151	2016-11-21	12:18:20	2513	5197	460	130
1152	2016-11-21	14:54:49	2650	5169	459	48
1153	2016-11-21	16:32:06	2529	5203	461	690
1154	2016-11-21	17:16:22	2547	5114	460	150
1155	2016-11-21	18:20:39	2505	5105	460	29
1156	2016-11-21	22:25:36	2587	5100	460	320
1157	2016-11-21	23:04:28	2536	5146	460	88
1158	2016-11-22	00:00:04	2571	5184	461	390
1159	2016-11-22	00:09:00	2613	5203	461	27
1160	2016-11-22	00:40:21	2503	5173	461	25
1161	2016-11-22	01:18:00	2555	5229	460	630
1162	2016-11-22	01:40:08	2587	5143	461	3.6
1163	2016-11-22	11:14:47	2581	5160	460	350
1164	2016-11-22	11:42:25	2476	5160	457	3700
1165	2016-11-22	12:37:44	2539	5206	460	100
1166	2016-11-22	13:15:35	2519	5086	460	240
1167	2016-11-22	15:43:58	2529	5178	460	5800
1168	2016-11-22	17:24:32	2607	5137	460	36
1169	2016-11-22	18:13:50	2555	5229	460	100
1170	2016-11-22	19:34:19	2513	5197	460	4.3
1171	2016-11-22	19:43:37	2581	5123	460	36
1172	2016-11-23	06:14:14	2496	5169	460	0.57
1173	2016-11-23	11:29:33	2545	5229	460	740
1174	2016-11-23	18:03:21	2613	5229	460	1900
1175	2016-11-23	19:45:56	2545	5095	460	810
1176	2016-11-23	20:50:58	2587	5229	460	130
1177	2016-11-23	21:30:03	2581	5229	460	510
1178	2016-11-24	04:50:35	2529	5155	460	120
1179	2016-11-24	07:41:32	2513	5206	460	95000
1180	2016-11-24	08:27:45	2513	5118	460	9500000
1181	2016-11-24	17:10:39	2767	5215	459	150
1182	2016-11-24	17:23:09	2682	5229	459	690
1183	2016-11-26	12:53:46	2495	5085	460	760
1184	2016-11-26	13:50:19	2563	5173	460	2200
1185	2016-11-26	14:18:58	2597	5118	460	1100
1186	2016-11-26	15:41:35	2503	5178	460	3800
1187	2016-11-26	16:07:57	2496	5169	460	1200
1188	2016-11-27	01:58:10	2516	5139	457	1000
1189	2016-11-28	19:24:10	1479	4609	453	2500
1190	2016-11-28	19:29:23	2529	5146	460	35000
1191	2016-11-28	20:47:02	1517	4561	424	13000
1192	2016-11-28	20:54:54	1550	4674	440	6600
1193	2016-11-29	18:48:41	2571	5229	460	890
1194	2016-11-29	19:04:51	2555	5178	460	510
1195	2016-11-29	22:18:56	2472	5152	461	3100
1196	2016-11-29	23:35:18	2472	5152	461	3700
1197	2016-11-30	03:50:00	2555	5118	460	170
1198	2016-11-30	09:55:10	2503	5178	460	1400
1199	2016-11-30	19:06:47	2623	5155	460	1400
1200	2016-11-30	19:17:44	2571	5132	460	210
1201	2016-11-30	19:26:53	2555	5178	457	520
1202	2016-11-30	19:31:36	2529	5169	457	4500
1203	2016-11-30	19:34:26	2613	5203	461	48
1204	2016-11-30	19:43:03	2561	5215	460	5200
1205	2016-11-30	19:44:24	2581	5192	461	450
1206	2016-11-30	20:33:09	2539	5197	460	12000
1207	2016-11-30	21:42:40	2444	5160	457	16000
1208	2016-12-01	00:55:03	2555	5155	460	150
1209	2016-12-01	01:16:11	2613	5192	460	510
1210	2016-12-01	04:17:47	2561	5160	457	15000
1211	2016-12-01	04:37:47	1344	4565	456	6200
1212	2016-12-01	05:24:01	2513	5154	461	810
1213	2016-12-01	06:03:56	2529	5100	460	920
1214	2016-12-01	08:39:58	2513	5206	460	3500
1215	2016-12-01	08:41:08	2587	5123	457	300
1216	2016-12-01	09:10:53	2529	5206	460	1600
1217	2016-12-01	09:18:51	2630	5137	457	75
1218	2016-12-01	11:06:59	2519	5100	460	55
1219	2016-12-01	14:52:57	2529	5160	460	370
1220	2016-12-01	15:06:10	2555	5109	460	1600
1221	2016-12-01	20:09:06	2471	5100	460	1600
1222	2016-12-01	20:27:30	2666	5183	460	51000
1223	2016-12-01	20:28:07	2666	5203	459	570
1224	2016-12-01	20:58:56	2519	5094	460	29
1225	2016-12-01	21:13:08	2513	5162	461	14
1226	2016-12-01	22:25:35	2460	5160	457	32000
1227	2016-12-01	22:28:39	2496	5173	461	390
1228	2016-12-01	23:21:05	2489	5160	461	44
1229	2016-12-01	23:41:26	2519	5229	460	86
1230	2016-12-01	23:45:37	2516	5170	460	320
1231	2016-12-01	23:53:01	2519	5215	460	2900
1232	2016-12-02	00:33:39	2517	5186	460	180
1233	2016-12-02	01:48:13	2630	5184	457	3100
1234	2016-12-02	03:46:37	2552	5181	460	4100
1235	2016-12-02	04:03:24	2529	5169	457	1200
1236	2016-12-02	04:03:27	2496	5100	460	2500
1237	2016-12-02	04:04:33	2613	5162	461	99
1238	2016-12-02	04:05:44	2555	5137	457	670
1239	2016-12-02	04:10:56	2538	5184	460	410
1240	2016-12-02	06:02:33	2555	5192	457	890
1241	2016-12-02	06:14:06	2650	5192	460	1100
1242	2016-12-02	07:53:54	2650	5126	460	7100
1243	2016-12-02	12:24:40	2597	5229	460	1600
1244	2016-12-02	13:37:30	2555	5203	461	1100
1245	2016-12-02	15:23:54	2470	5109	460	50
1246	2016-12-02	16:56:28	2496	5169	460	150
1247	2016-12-02	19:01:40	1390	4475	390	2800
1248	2016-12-02	20:11:11	2496	5169	460	340
1249	2016-12-02	20:58:45	2503	5160	460	6500
1250	2016-12-02	21:33:25	2470	5132	460	1200
1251	2016-12-02	22:35:22	2571	5109	460	3400
1252	2016-12-02	22:48:56	2513	5192	457	80
1253	2016-12-02	22:51:01	2519	5197	460	850
1254	2016-12-02	22:58:06	2486	5162	461	14
1255	2016-12-02	23:24:28	2519	5197	460	190
1256	2016-12-02	23:27:12	2496	5100	457	8700
1257	2016-12-03	01:13:24	2513	5169	457	180
1258	2016-12-03	02:05:00	2496	5169	460	1100
1259	2016-12-03	04:03:50	2519	5155	457	13000
1260	2016-12-03	04:20:40	2581	5143	461	11
1261	2016-12-03	04:55:32	2529	5206	460	17000
1262	2016-12-03	05:22:51	2519	5206	460	12000
1263	2016-12-03	06:03:20	2587	5229	460	2400
1264	2016-12-03	06:31:34	2503	5132	460	80000
1265	2016-12-03	07:03:19	2513	5169	460	4700
1266	2016-12-03	07:03:50	2503	5155	457	78
1267	2016-12-03	08:03:45	0	0	0	0
1268	2016-12-03	08:24:05	2539	5203	461	150
1269	2016-12-03	08:59:26	2460	5109	460	980
1270	2016-12-03	09:06:02	2503	5192	457	14000
1271	2016-12-03	11:05:34	2555	5173	461	180
1272	2016-12-03	12:39:59	2519	5100	457	210
1273	2016-12-03	13:52:32	2623	5229	460	970
1274	2016-12-03	14:26:20	2503	5192	460	130
1275	2016-12-03	15:25:55	2561	5123	460	700
1276	2016-12-03	22:14:27	2476	5162	461	34
1277	2016-12-03	23:09:00	2529	5160	460	5800
1278	2016-12-03	23:12:11	2587	5146	457	6900
1279	2016-12-03	23:14:52	2545	5169	457	28000
1280	2016-12-03	23:46:58	2561	5229	460	680
1281	2016-12-03	23:59:42	2519	5229	460	390
1282	2016-12-04	00:10:00	2539	5118	460	47
1283	2016-12-04	00:11:05	2496	5160	457	3100
1284	2016-12-04	00:13:41	2529	5229	460	2000
1285	2016-12-04	00:19:49	2496	5169	460	760
1286	2016-12-04	00:30:08	2503	5118	457	2400
1287	2016-12-04	00:36:27	2496	5169	460	1200
1288	2016-12-04	00:45:06	2503	5206	460	14000
1289	2016-12-04	01:13:21	2529	5220	460	7200
1290	2016-12-04	01:18:14	2472	5144	461	3900
1291	2016-12-04	03:12:54	2545	5192	460	300
1292	2016-12-04	03:13:37	2555	5137	460	12000
1293	2016-12-04	03:23:22	2503	5197	460	400
1294	2016-12-04	03:25:50	2555	5229	460	280
1295	2016-12-04	03:33:42	2640	5203	459	9400
1296	2016-12-04	03:45:32	2555	5203	461	37
1297	2016-12-04	04:24:41	2513	5192	460	9900
1298	2016-12-04	04:27:47	2476	5109	460	400
1299	2016-12-04	04:46:13	2496	5169	460	2700
1300	2016-12-04	06:18:29	2571	5146	457	85
1301	2016-12-04	06:24:19	2640	5169	460	190
1302	2016-12-04	06:32:40	2489	5160	461	380
1303	2016-12-04	07:03:34	2499	5165	460	510
1304	2016-12-04	07:05:11	2504	5113	460	120
1305	2016-12-04	07:24:34	2558	5159	460	68000
1306	2016-12-04	09:57:24	2623	5137	457	97
1307	2016-12-04	10:42:55	2597	5146	460	410
1308	2016-12-04	10:55:13	2571	5220	460	1500
1309	2016-12-04	12:00:21	2571	5206	457	210
1310	2016-12-04	12:15:32	2513	5192	460	8000
1311	2016-12-04	12:21:40	2545	5178	457	330
1312	2016-12-04	13:46:02	2470	5160	460	1500
1313	2016-12-04	13:49:25	2587	5095	457	4700
1314	2016-12-04	15:30:10	2496	5169	460	1100
1315	2016-12-04	19:21:47	2418	5123	460	2300
1316	2016-12-04	21:28:19	2513	5192	460	32000
1317	2016-12-04	21:39:41	2486	5160	460	3700
1318	2016-12-04	21:54:53	2496	5169	460	860
1319	2016-12-04	22:22:15	2561	5160	457	430000
1320	2016-12-04	23:21:25	2503	5160	457	2100
1321	2016-12-04	23:49:27	2418	5118	460	250
1322	2016-12-05	05:04:01	2513	5155	460	8900
1323	2016-12-05	05:34:52	2503	5178	460	220
1324	2016-12-05	06:26:31	2581	5229	460	1800
1325	2016-12-05	09:30:09	2561	5123	460	99
1326	2016-12-05	12:26:19	2581	5229	460	180
1327	2016-12-05	13:09:28	2521	5190	460	17000
1328	2016-12-05	13:54:52	2503	5086	457	3000
1329	2016-12-05	15:51:25	2561	5132	460	1800
1330	2016-12-05	16:00:52	2529	5215	460	2700
1331	2016-12-05	16:09:47	2545	5160	457	360
1332	2016-12-05	18:16:34	2555	5100	460	560
1333	2016-12-05	18:47:50	2561	5118	460	63
1334	2016-12-05	19:33:57	2571	5109	460	570
1335	2016-12-05	19:35:23	2581	5143	461	22
1336	2016-12-05	19:37:32	2513	5197	460	200
1337	2016-12-05	19:39:48	2499	5172	461	150
1338	2016-12-05	21:35:40	2650	5169	460	5300
1339	2016-12-05	21:36:52	2496	5173	461	23
1340	2016-12-05	22:34:24	2503	5197	460	1100
1341	2016-12-05	23:12:44	2517	5127	460	39
1342	2016-12-06	01:12:55	2545	5206	457	2000
1343	2016-12-06	01:22:10	2503	5160	460	99
1344	2016-12-06	02:43:36	2513	5178	457	4000
1345	2016-12-06	02:52:32	2539	5192	457	2100
1346	2016-12-06	03:09:16	2571	5146	460	6300
1347	2016-12-06	03:49:56	2561	5118	460	2900
1348	2016-12-06	06:40:08	2519	5173	461	1200
1349	2016-12-06	09:17:36	2539	5132	460	270
1350	2016-12-06	09:27:34	2503	5183	457	2300
1351	2016-12-06	09:36:29	2519	5197	460	9400
1352	2016-12-06	09:49:04	2519	5206	460	3900
1353	2016-12-06	10:15:42	2545	5229	460	320
1354	2016-12-06	10:56:30	2545	5229	460	970
1355	2016-12-06	11:29:11	2571	5137	460	560
1356	2016-12-06	12:46:49	2508	5177	460	440
1357	2016-12-06	13:51:23	2587	5229	460	190
1358	2016-12-06	14:48:06	2539	5183	460	150
1359	2016-12-06	14:50:38	2571	5183	457	390
1360	2016-12-06	15:00:54	2587	5132	460	39000
1361	2016-12-06	15:35:30	2545	5197	460	1600
1362	2016-12-06	16:19:10	2503	5094	457	2300
1363	2016-12-06	16:56:51	2513	5183	460	450
1364	2016-12-06	17:59:46	2470	5155	457	1300
1365	2016-12-06	18:52:43	2545	5229	460	900
1366	2016-12-06	19:07:56	2503	5192	460	580
1367	2016-12-06	20:52:46	2561	5113	461	810
1368	2016-12-06	22:57:52	2470	5160	460	12000
1369	2016-12-07	00:26:46	2499	5160	461	170
1370	2016-12-07	00:30:30	2539	5154	461	11
1371	2016-12-07	00:41:32	2503	5160	460	85
1372	2016-12-07	00:41:39	2555	5155	460	60
1373	2016-12-07	01:52:52	2613	5229	460	19000
1374	2016-12-07	02:06:51	2513	5169	460	1600
1375	2016-12-07	02:21:36	2529	5203	461	330
1376	2016-12-07	03:09:24	2486	5137	460	22000
1377	2016-12-07	04:23:03	2513	5203	460	1500
1378	2016-12-07	05:14:34	2496	5169	460	8700
1379	2016-12-07	07:23:25	2571	5160	460	1700
1380	2016-12-07	07:44:23	2418	5169	457	2600
1381	2016-12-07	08:07:57	2613	5155	460	7900
1382	2016-12-07	08:14:08	2529	5197	457	2400
1383	2016-12-07	08:47:36	2561	5118	460	42
1384	2016-12-07	08:56:56	2561	5229	460	210
1385	2016-12-07	09:00:51	2521	5180	457	490
1386	2016-12-07	10:52:34	2470	5155	457	370
1387	2016-12-07	11:55:05	2581	5155	457	4500
1388	2016-12-07	12:29:38	2571	5160	457	2600
1389	2016-12-07	13:30:26	2499	5205	461	440
1390	2016-12-07	15:05:06	2529	5206	460	31000
1391	2016-12-07	15:58:26	2529	5206	460	400
1392	2016-12-07	16:19:22	2523	5229	460	68000
1393	2016-12-07	16:47:14	2513	5206	460	9100
1394	2016-12-07	17:33:59	2561	5220	460	7300
1395	2016-12-07	19:59:12	2496	5169	460	3400
1396	2016-12-07	21:28:21	2470	5118	460	47
1397	2016-12-07	22:12:02	2503	5169	457	2100
1398	2016-12-07	23:43:51	2496	5169	460	500
1399	2016-12-08	00:09:35	2503	5192	460	1900
1400	2016-12-08	00:15:33	2496	5132	460	55
1401	2016-12-08	00:15:57	2539	5192	457	480
1402	2016-12-08	00:42:01	2581	5169	457	170
1403	2016-12-08	01:08:22	1230	4375	457	1300
1404	2016-12-08	01:43:28	2539	5229	460	2000
1405	2016-12-08	03:46:42	2503	5160	460	28
1406	2016-12-08	03:47:22	2581	5123	460	9500
1407	2016-12-08	04:04:05	2496	5169	460	330
1408	2016-12-08	04:27:03	2571	5132	457	730
1409	2016-12-08	04:40:11	2561	5123	460	7100
1410	2016-12-08	04:59:06	2503	5183	460	29000
1411	2016-12-08	05:14:48	2503	5178	460	8700
1412	2016-12-08	05:20:28	2503	5183	457	2700
1413	2016-12-08	07:09:45	2503	5169	460	32000
1414	2016-12-08	08:58:06	2539	5183	460	52000
1415	2016-12-08	10:25:29	2392	5086	457	43000
1416	2016-12-08	11:06:37	2561	5086	460	1300
1417	2016-12-08	11:13:51	2513	5206	460	320
1418	2016-12-08	11:40:25	2581	5118	460	390
1419	2016-12-08	12:10:30	2503	5080	460	1.3
1420	2016-12-08	12:50:03	2587	5160	460	41
1421	2016-12-08	16:57:22	2513	5197	460	66000
1422	2016-12-08	17:57:24	2503	5137	460	100
1423	2016-12-08	19:37:17	2676	5155	457	5400
1424	2016-12-08	19:41:35	2528	5153	460	9300
1425	2016-12-08	23:35:53	2531	5158	460	240
1426	2016-12-08	23:41:59	2552	5119	460	1300
1427	2016-12-09	00:52:19	2556	5130	457	9400
1428	2016-12-09	00:53:53	2476	5103	460	22
1429	2016-12-09	01:31:23	2490	5178	460	270
1430	2016-12-09	04:17:35	2533	5104	457	890
1431	2016-12-09	06:22:47	2503	5160	457	6100
1432	2016-12-09	06:38:34	2519	5118	460	2000
1433	2016-12-09	06:55:28	2561	5220	460	370
1434	2016-12-09	07:13:52	2561	5132	457	78000000
1435	2016-12-09	07:17:10	2666	5154	457	6300
1436	2016-12-09	07:30:14	2539	5146	460	14000
1437	2016-12-09	09:10:32	1246	4418	456	960
1438	2016-12-09	10:10:40	2555	5132	460	120
1439	2016-12-09	12:23:16	2561	5155	460	1400
1440	2016-12-09	13:05:43	2476	5160	460	88
1441	2016-12-09	13:06:22	2623	5229	460	460
1442	2016-12-09	13:16:48	2597	5132	460	2500
1443	2016-12-09	16:20:32	2503	5192	457	170
1444	2016-12-09	17:44:18	2575	5132	460	160000
1445	2016-12-09	18:41:14	2545	5132	457	800
1446	2016-12-09	21:38:21	2496	5169	460	1400
1447	2016-12-09	22:31:07	1945	4647	421	3200
1448	2016-12-09	23:54:04	2460	5109	460	5700
1449	2016-12-10	01:51:11	2571	5109	460	290
1450	2016-12-10	01:52:39	2529	5169	457	410
1451	2016-12-10	02:10:56	2496	5109	460	77
1452	2016-12-10	02:19:40	2496	5160	457	3100
1453	2016-12-10	04:33:08	1440	4644	464	1400
1454	2016-12-10	06:26:57	2545	5192	457	5000
1455	2016-12-10	06:27:32	2519	5160	460	1900
1456	2016-12-10	06:29:06	2486	5160	460	2600
1457	2016-12-10	06:29:28	2561	5160	460	680
1458	2016-12-10	06:40:00	2496	5169	460	1200
1459	2016-12-10	09:20:29	2561	5154	461	15000
1460	2016-12-10	09:38:05	2503	5106	460	17000
1461	2016-12-10	11:29:20	2545	5160	457	520
1462	2016-12-10	13:03:30	2503	5100	457	80
1463	2016-12-10	13:04:09	2519	5155	457	4300
1464	2016-12-10	13:13:55	2513	5086	460	260
1465	2016-12-10	15:05:34	2472	5160	461	11000
1466	2016-12-10	15:33:28	2486	5123	460	560
1467	2016-12-10	15:52:16	2496	5169	460	29
1468	2016-12-10	16:36:14	2519	5192	457	200
1469	2016-12-10	18:37:29	2539	5100	460	360
1470	2016-12-10	19:48:25	2496	5118	460	4700
1471	2016-12-10	23:40:43	2482	5107	460	520
1472	2016-12-11	00:20:18	2496	5160	460	2800
1473	2016-12-11	00:25:19	2470	5155	457	140
1474	2016-12-11	01:10:16	2392	5160	457	370
1475	2016-12-11	01:24:41	2539	5137	460	1300
1476	2016-12-11	01:24:53	2496	5123	460	520
1477	2016-12-11	01:42:41	2519	5206	460	1100
1478	2016-12-11	04:40:12	2482	5160	461	3600
1479	2016-12-11	04:48:52	2503	5155	460	36000
1480	2016-12-11	05:00:25	2499	5152	461	2700
1481	2016-12-11	06:35:03	2571	5146	460	87000
1482	2016-12-11	06:45:42	2513	5183	460	73000
1483	2016-12-11	10:17:30	2496	5169	460	3200
1484	2016-12-11	10:20:00	2486	5169	460	92
1485	2016-12-11	11:05:38	2503	5160	460	760
1486	2016-12-11	11:28:47	2587	5229	460	2500
1487	2016-12-11	11:41:11	2513	5192	460	4600
1488	2016-12-11	13:21:56	2503	5137	460	520
1489	2016-12-11	15:01:43	2529	5146	460	200
1490	2016-12-11	15:25:57	2571	5192	460	27000
1491	2016-12-11	15:56:16	2496	5169	460	1100
1492	2016-12-12	00:04:51	2550	5197	460	210
1493	2016-12-12	00:06:13	2489	5086	460	37
1494	2016-12-12	00:40:09	2501	5123	460	13000
1495	2016-12-12	01:04:05	2649	5229	460	7100
1496	2016-12-12	01:13:29	2489	5160	457	1700
1497	2016-12-12	01:24:00	2649	5192	460	1800
1498	2016-12-12	02:17:21	2501	5192	460	3100
1499	2016-12-12	02:42:56	2607	5155	460	170
1500	2016-12-12	05:35:39	2428	5080	460	5600
1501	2016-12-12	06:01:37	2420	5070	460	23
1502	2016-12-12	08:24:09	2459	5123	460	31
1503	2016-12-12	08:27:08	2569	5155	457	160
1504	2016-12-12	08:34:47	1424	4615	464	100
1505	2016-12-12	08:42:18	2539	5178	457	1500
1506	2016-12-12	08:55:45	2581	5213	461	46
1507	2016-12-12	09:33:00	2607	5155	457	9500
1508	2016-12-12	11:26:12	2527	5137	460	120
1509	2016-12-12	11:26:16	2489	5192	460	88
1510	2016-12-12	13:38:04	2470	5123	460	49
1511	2016-12-12	13:38:32	2569	5178	460	500
1512	2016-12-12	14:12:59	2668	5169	457	76
1513	2016-12-12	14:32:56	2489	5197	460	2400
1514	2016-12-12	15:07:49	2600	5160	460	620
1515	2016-12-12	15:31:59	2459	5183	460	15000
1516	2016-12-12	15:36:24	2607	5178	457	230
1517	2016-12-12	16:18:49	2607	5132	457	710
1518	2016-12-12	16:19:55	2527	5160	460	770
1519	2016-12-12	17:58:35	2558	5132	460	270
1520	2016-12-12	22:52:04	2435	5134	461	1100
1521	2016-12-12	23:04:42	2489	5183	457	33000
1522	2016-12-12	23:34:59	2503	5145	461	4100
1523	2016-12-12	23:35:05	2452	5132	457	11000
1524	2016-12-12	23:46:09	1193	4392	456	280
1525	2016-12-13	01:23:47	2501	5169	460	46000
1526	2016-12-13	01:36:24	2508	5137	460	800
1527	2016-12-13	01:54:46	2527	5160	457	1200
1528	2016-12-13	03:04:20	2459	5137	460	4900
1529	2016-12-13	07:07:03	2513	5122	461	210
1530	2016-12-13	08:49:49	2491	5142	460	56
1531	2016-12-13	11:01:29	2550	5178	460	1400
1532	2016-12-13	11:59:52	2625	5137	460	110
1533	2016-12-13	14:01:38	2500	5125	460	490
1534	2016-12-13	15:36:10	2641	5166	460	710
1535	2016-12-13	18:25:12	2575	5079	460	270
1536	2016-12-13	19:36:13	2501	5183	460	2200
1537	2016-12-14	04:28:13	2459	5183	460	4500
1538	2016-12-14	04:29:09	2487	5150	457	19000
1539	2016-12-14	04:29:43	2478	5119	457	2600
1540	2016-12-14	04:29:52	2520	5067	457	210
1541	2016-12-14	04:48:36	2528	5125	460	1600
1542	2016-12-14	04:51:24	2487	5104	457	2400
1543	2016-12-14	07:40:43	2478	5132	460	28000
1544	2016-12-14	08:40:17	2508	5183	460	90
1545	2016-12-14	09:46:14	2527	5086	460	81
1546	2016-12-14	11:37:16	2503	5104	460	1200
1547	2016-12-14	21:29:55	2501	5172	460	1700
1548	2016-12-14	21:35:46	2453	5134	457	830
1549	2016-12-14	23:15:11	2440	5142	460	13000
1550	2016-12-14	23:32:14	2194	5054	460	1400
1551	2016-12-14	23:56:48	2409	5086	460	550
1552	2016-12-15	00:01:09	2501	5118	460	770
1553	2016-12-15	00:03:11	2520	5160	460	8800
1554	2016-12-15	00:07:52	2527	5197	460	760
1555	2016-12-15	01:37:22	2508	5215	460	180
1556	2016-12-15	02:15:48	2426	5137	460	3000
1557	2016-12-15	02:43:40	2444	5143	463	66
1558	2016-12-15	03:02:00	2444	5143	463	170
1559	2016-12-15	04:18:19	2451	5141	463	150
1560	2016-12-15	05:19:42	2452	5155	460	5900
1561	2016-12-15	05:42:55	1413	4496	421	4000
1562	2016-12-15	07:05:46	2462	5110	457	990
1563	2016-12-15	07:09:30	2446	5145	460	910
1564	2016-12-15	07:19:54	2437	5134	457	2400
1565	2016-12-15	07:26:03	2539	5118	460	23000
1566	2016-12-15	08:27:24	2489	5215	460	300
1567	2016-12-15	08:27:30	2470	5072	460	37
1568	2016-12-15	08:39:02	2478	5215	460	5000
1569	2016-12-15	08:40:53	2489	5118	457	930
1570	2016-12-15	08:42:03	2508	5192	457	2100
1571	2016-12-15	08:54:05	2508	5229	460	520
1572	2016-12-15	09:54:07	2508	5206	460	3000
1573	2016-12-15	09:59:04	2440	5146	460	2000
1574	2016-12-15	10:48:27	2440	5072	457	92
1575	2016-12-15	11:00:49	1225	4379	460	1200
1576	2016-12-15	11:21:16	2520	5178	460	450
1577	2016-12-15	11:50:22	2589	5123	460	340
1578	2016-12-15	12:21:44	2453	5060	460	42000
1579	2016-12-15	16:06:28	1289	4443	464	54
1580	2016-12-15	17:56:53	2398	5080	460	350
1581	2016-12-15	20:01:27	2468	5145	461	210
1582	2016-12-15	20:04:47	2447	5110	457	2600
1583	2016-12-15	20:07:05	2435	5104	460	140
1584	2016-12-15	20:21:40	2489	5138	460	180
1585	2016-12-15	20:23:00	2550	5213	460	4300
1586	2016-12-15	21:51:57	2519	5119	460	210
1587	2016-12-15	23:36:45	2503	5105	461	250
1588	2016-12-15	23:56:14	2501	5109	460	6800
1589	2016-12-16	00:09:07	2468	5125	457	4000
1590	2016-12-16	01:00:11	2527	5178	460	8700
1591	2016-12-16	01:02:49	2501	5095	460	1100
1592	2016-12-16	01:03:19	2452	5072	460	260
1593	2016-12-16	01:14:37	2452	5178	460	5000
1594	2016-12-16	01:15:15	2440	5155	457	170
1595	2016-12-16	01:15:52	2470	5146	460	770
1596	2016-12-16	01:17:07	2470	5072	460	190
1597	2016-12-16	02:01:38	2478	5137	457	140
1598	2016-12-16	02:33:29	1435	4634	421	3100
1599	2016-12-16	03:39:47	2468	5159	457	470
1600	2016-12-16	04:02:31	2509	5119	460	160
1601	2016-12-16	04:59:47	2452	5057	460	120
1602	2016-12-16	05:00:19	2398	5118	460	4200
1603	2016-12-16	06:06:41	2501	5123	460	170
1604	2016-12-16	06:19:21	2588	5163	457	29
1605	2016-12-16	06:20:03	2478	5080	460	12
1606	2016-12-16	07:18:58	2440	5137	460	250
1607	2016-12-16	07:26:19	2421	5080	460	42
1608	2016-12-16	07:27:35	2520	5178	460	4800
1609	2016-12-16	08:10:43	2452	5063	457	14
1610	2016-12-16	08:38:20	2452	5080	460	10
1611	2016-12-16	08:38:58	2440	5137	460	8200
1612	2016-12-16	08:39:12	2478	5206	460	420
1613	2016-12-16	08:47:00	2459	5118	460	170
1614	2016-12-16	08:58:28	2379	5049	460	60
1615	2016-12-16	09:27:36	2558	5123	460	31
1616	2016-12-16	10:47:47	2558	5132	460	110
1617	2016-12-16	11:19:53	2428	5138	460	150
1618	2016-12-16	12:19:22	2470	5146	460	4800
1619	2016-12-16	12:48:05	2503	5110	460	250
1620	2016-12-16	13:58:40	2440	5049	460	280
1621	2016-12-16	14:09:43	2478	5155	460	3000
1622	2016-12-16	14:10:50	2447	5159	460	250
1623	2016-12-16	14:13:00	2459	5095	457	420
1624	2016-12-16	14:30:28	2558	5137	460	120
1625	2016-12-16	14:36:31	2435	5020	457	23
1626	2016-12-16	14:41:47	2475	5144	461	33
1627	2016-12-16	14:58:04	2581	5132	460	130
1628	2016-12-16	15:03:07	2500	5110	461	620
1629	2016-12-16	16:45:55	2501	5107	460	62
1630	2016-12-16	17:19:22	2489	5086	460	13000
1631	2016-12-16	18:05:13	2478	5169	457	330
1632	2016-12-16	18:07:05	2452	5155	460	1300
1633	2016-12-16	18:27:42	2428	5072	460	43
1634	2016-12-16	19:36:03	2452	5057	460	270
1635	2016-12-16	19:42:51	2630	5215	460	170
1636	2016-12-16	20:12:11	2527	5118	460	570
1637	2016-12-16	20:12:42	2478	5146	457	23
1638	2016-12-16	21:11:04	2539	5206	460	79
1639	2016-12-16	21:13:13	2489	5146	460	720
1640	2016-12-16	22:22:59	2520	5229	460	130
1641	2016-12-16	22:45:58	2440	5100	460	7700
1642	2016-12-16	22:55:02	2489	5118	460	1100
1643	2016-12-17	00:05:08	2539	5178	460	290
1644	2016-12-17	00:10:34	2440	5049	460	630
1645	2016-12-17	00:39:27	2391	5082	460	220
1646	2016-12-17	03:12:51	2508	5132	457	3800
1647	2016-12-17	04:21:20	2630	5169	460	2800
1648	2016-12-17	04:34:49	2435	5125	461	140
1649	2016-12-17	04:48:09	2493	5134	457	830
1650	2016-12-17	04:48:21	2435	5144	461	19
1651	2016-12-17	05:46:05	2452	5063	457	20000
1652	2016-12-17	06:42:03	2451	5144	461	28
1653	2016-12-17	07:01:28	2508	5215	460	79
1654	2016-12-17	07:13:24	2508	5169	460	140
1655	2016-12-17	07:22:45	2501	5169	460	630
1656	2016-12-17	07:41:45	2470	5080	460	99
1657	2016-12-17	07:44:38	2452	5063	457	17
1658	2016-12-17	08:02:50	2600	5123	460	250
1659	2016-12-17	08:04:41	2459	5095	457	8
1660	2016-12-17	08:27:48	2346	5110	457	2400
1661	2016-12-17	09:47:49	2470	5148	461	0.35
1662	2016-12-17	11:16:25	2470	5163	460	190
1663	2016-12-17	11:32:11	2501	5160	457	73
1664	2016-12-17	12:01:31	2590	5173	457	39
1665	2016-12-17	13:12:33	2485	5134	460	170
1666	2016-12-17	13:18:23	2588	5146	460	1300
1667	2016-12-17	13:39:16	2474	5175	460	290
1668	2016-12-17	13:45:59	2594	5159	460	140
1669	2016-12-17	14:27:45	2519	5125	460	250
1670	2016-12-17	15:18:13	2514	5182	460	6300
1671	2016-12-17	16:53:43	2489	5203	460	9300
1672	2016-12-17	16:59:38	2550	5113	460	170
1673	2016-12-17	17:58:13	2562	5131	460	130
1674	2016-12-17	17:59:12	2485	5088	460	43
1675	2016-12-17	18:05:12	2488	5144	460	100
1676	2016-12-17	18:11:53	2444	5155	460	210
1677	2016-12-17	18:36:26	2480	5137	460	39000
1678	2016-12-17	18:45:21	2538	5125	460	2300
1679	2016-12-17	18:49:05	2519	5159	460	52000
1680	2016-12-17	18:49:57	2500	5138	457	350
1681	2016-12-17	18:52:58	2538	5141	457	2600
1682	2016-12-17	19:15:58	2412	5080	460	210
1683	2016-12-17	19:21:52	2489	5206	460	7100
1684	2016-12-17	19:33:45	2489	5155	460	100
1685	2016-12-17	19:36:20	2476	5104	460	96
1686	2016-12-17	20:54:35	2559	5134	460	33000
1687	2016-12-17	21:11:39	2503	5123	460	610
1688	2016-12-17	21:43:27	2509	5110	460	2300
1689	2016-12-17	21:47:23	2459	5092	460	390
1690	2016-12-17	22:03:07	1450	4615	433	3300
1691	2016-12-17	22:28:56	1231	4404	453	1500
1692	2016-12-17	22:31:37	2520	5118	460	360000
1693	2016-12-17	23:18:38	2489	5132	460	88
1694	2016-12-18	00:16:46	2433	5145	460	12000
1695	2016-12-18	00:17:15	2497	5142	460	76
1696	2016-12-18	00:17:19	2524	5097	460	400
1697	2016-12-18	00:28:18	2581	5098	460	68
1698	2016-12-18	01:53:15	2456	5166	460	210
1699	2016-12-18	02:00:20	2558	5206	460	1500
1700	2016-12-18	03:11:25	2591	5215	459	5100
1701	2016-12-18	03:37:35	2470	5113	457	240
1702	2016-12-18	10:03:14	2470	5057	460	350
1703	2016-12-18	10:09:44	2470	5072	460	22
1704	2016-12-18	11:33:42	2544	5159	460	3000
1705	2016-12-18	12:55:19	2553	5110	460	340
1706	2016-12-18	13:47:45	2779	5203	460	6800
1707	2016-12-18	14:25:22	2519	5144	457	640
1708	2016-12-18	15:22:19	2478	5113	457	220
1709	2016-12-18	16:47:40	2437	5134	460	180
1710	2016-12-18	16:49:08	2440	5138	460	240
1711	2016-12-18	16:55:01	2478	5072	460	96
1712	2016-12-18	16:56:34	2468	5145	461	970
1713	2016-12-18	16:59:03	2478	5094	457	13000
1714	2016-12-18	17:28:40	2519	5125	460	2600
1715	2016-12-18	17:44:49	2402	5085	460	260
1716	2016-12-18	18:17:10	2501	5229	460	140
1717	2016-12-18	18:58:49	2509	5150	457	180
1718	2016-12-18	19:12:22	2411	5110	460	510
1719	2016-12-18	19:26:48	2528	5145	461	67
1720	2016-12-18	20:35:41	2478	5092	457	130
1721	2016-12-18	20:36:06	2508	5092	460	71
1722	2016-12-18	20:58:00	2569	5145	461	94
1723	2016-12-18	21:17:34	2428	5132	460	150
1724	2016-12-19	00:34:01	2544	5134	457	140
1725	2016-12-19	02:00:09	2558	5123	460	100
1726	2016-12-19	06:40:30	2520	5137	460	1000
1727	2016-12-19	06:44:01	2519	5110	460	580
1728	2016-12-19	06:46:47	2493	5159	460	260
1729	2016-12-19	07:12:29	2493	5125	457	7800
1730	2016-12-19	07:19:06	2493	5110	457	35000
1731	2016-12-19	09:29:23	2581	5155	460	82
1732	2016-12-19	09:36:45	2559	5144	457	2200
1733	2016-12-19	09:54:57	2452	5072	457	130
1734	2016-12-19	10:49:29	2501	5137	460	29000
1735	2016-12-19	10:51:17	2502	5160	457	2500
1736	2016-12-19	11:59:56	2408	5143	461	120
1737	2016-12-19	12:01:39	2614	5229	460	160
1738	2016-12-19	12:36:57	2453	5134	460	2400
1739	2016-12-19	12:52:42	2544	5159	460	15000
1740	2016-12-19	14:06:47	2437	5134	460	480
1741	2016-12-19	14:54:15	2437	5134	460	3100
1742	2016-12-19	15:29:27	2437	5134	460	23000
1743	2016-12-19	16:02:25	2398	5082	460	360
1744	2016-12-19	16:06:03	2437	5150	460	2300
1745	2016-12-19	17:07:41	2452	5109	460	2200
1746	2016-12-19	17:37:01	2440	5132	457	1400
1747	2016-12-19	17:41:31	2478	5109	460	360
1748	2016-12-19	17:46:19	2409	5178	457	280
1749	2016-12-19	17:53:28	2421	5137	460	220
1750	2016-12-19	17:53:46	2489	5206	460	100
1751	2016-12-19	18:40:11	2501	5197	460	270
1752	2016-12-19	19:35:24	2544	5104	460	94
1753	2016-12-19	20:47:01	2459	5072	460	12000
1754	2016-12-19	23:47:30	2478	5109	460	220
1755	2016-12-19	23:58:37	1424	4621	464	2800
1756	2016-12-20	00:26:52	2528	5110	460	670
1757	2016-12-20	01:06:45	2539	5118	460	140
1758	2016-12-20	01:20:48	1434	4615	464	3500
1759	2016-12-20	01:42:16	2489	5109	460	51000
1760	2016-12-20	01:42:48	2581	5137	460	380
1761	2016-12-20	01:48:23	2489	5080	460	550
1762	2016-12-20	03:44:47	2391	5123	457	28000
1763	2016-12-20	07:43:44	2520	5229	460	470
1764	2016-12-20	07:57:14	2527	5095	460	1500
1765	2016-12-20	08:50:22	2459	5160	457	1600
1766	2016-12-20	09:28:19	2520	5163	460	57
1767	2016-12-20	10:05:39	2470	5109	457	260
1768	2016-12-20	10:25:12	2520	5160	460	70
1769	2016-12-20	10:46:55	2553	5134	457	180
1770	2016-12-20	11:26:47	2478	5109	460	150
1771	2016-12-20	11:37:47	2346	5104	460	270
1772	2016-12-20	13:03:20	2508	5192	460	1000
1773	2016-12-20	13:29:09	2443	5096	457	130
1774	2016-12-20	16:31:14	2325	4995	457	5400
1775	2016-12-20	16:33:08	2343	5110	457	1800
1776	2016-12-20	16:59:24	2459	5160	457	18
1777	2016-12-20	17:04:42	2508	5146	457	61
1778	2016-12-20	18:16:13	2437	5159	457	32000
1779	2016-12-20	18:26:47	2500	5125	461	19
1780	2016-12-20	18:28:12	2411	5079	460	100
1781	2016-12-20	19:55:55	2569	5178	460	120
1782	2016-12-20	23:14:04	2470	5183	460	510
1783	2016-12-20	23:20:42	2411	5125	461	110
1784	2016-12-20	23:25:22	2539	5100	460	47
1785	2016-12-20	23:56:48	2489	5160	457	600
1786	2016-12-21	00:04:47	2459	5178	460	290
1787	2016-12-21	00:06:53	2489	5172	461	1100
1788	2016-12-21	00:21:56	2550	5206	460	3100
1789	2016-12-21	00:22:33	2581	5132	460	310
1790	2016-12-21	00:24:09	2508	5109	460	53
1791	2016-12-21	01:23:58	2539	5229	460	140
1792	2016-12-21	01:25:33	2520	5109	460	14000
1793	2016-12-21	02:18:17	2649	5213	460	230
1794	2016-12-21	02:37:34	2489	5123	460	290
1795	2016-12-21	03:01:33	2493	5134	457	3400
1796	2016-12-21	03:14:59	2381	5125	460	46000
1797	2016-12-21	08:41:12	2489	5123	457	1700
1798	2016-12-21	09:55:01	2539	5132	460	320
1799	2016-12-21	10:14:20	2508	5183	460	220
1800	2016-12-21	11:23:36	2459	5137	457	140
1801	2016-12-21	11:35:55	2329	5095	457	7400
1802	2016-12-21	13:19:03	2539	5160	460	6700
1803	2016-12-21	13:50:29	2539	5215	460	4.8
1804	2016-12-21	15:08:32	2421	5057	460	550
1805	2016-12-21	18:24:09	2520	5178	460	66
1806	2016-12-21	19:27:02	2581	5229	460	4900
1807	2016-12-21	19:43:55	2409	5086	460	1200
1808	2016-12-21	19:51:37	2440	5137	460	4100
1809	2016-12-22	00:23:18	2440	5137	460	8700
1810	2016-12-22	00:36:30	2459	5178	460	76
1811	2016-12-22	00:37:07	2428	5155	460	480
1812	2016-12-22	01:03:55	2459	5100	457	10
1813	2016-12-22	01:18:46	2391	5109	460	89
1814	2016-12-22	01:32:27	2440	5057	460	110
1815	2016-12-22	01:33:38	2398	5086	460	82
1816	2016-12-22	01:36:31	2489	5109	457	74
1817	2016-12-22	01:43:56	2421	5057	460	380
1818	2016-12-22	01:44:02	2619	5160	460	90
1819	2016-12-22	01:48:19	2468	5104	457	180
1820	2016-12-22	02:42:18	2379	5058	457	9200
1821	2016-12-22	02:46:44	2396	5079	460	200
1822	2016-12-22	03:23:05	2520	5178	460	510
1823	2016-12-22	04:47:03	2459	5086	460	4300
1824	2016-12-22	05:56:22	2489	5118	460	4600
1825	2016-12-22	06:24:55	1507	4621	440	3100
1826	2016-12-22	06:49:45	2462	5110	460	120
1827	2016-12-22	08:40:34	2447	5125	460	1900
1828	2016-12-22	08:50:52	2346	5094	457	600
1829	2016-12-22	09:17:08	2459	5086	460	3700
1830	2016-12-22	09:19:27	2421	5132	460	12
1831	2016-12-22	11:18:09	2501	5100	460	440
1832	2016-12-22	11:38:52	2487	5094	460	140
1833	2016-12-22	12:28:56	2522	5154	460	31
1834	2016-12-22	12:31:24	2619	5178	460	330
1835	2016-12-22	12:38:57	2569	5155	457	52
1836	2016-12-22	13:23:49	2527	5118	460	1200
1837	2016-12-22	15:46:37	2435	5159	461	960
1838	2016-12-22	15:48:36	2482	5183	457	69000
1839	2016-12-22	18:49:06	2510	5166	460	660
1840	2016-12-22	19:46:09	2585	5131	460	6000
1841	2016-12-22	20:20:24	2620	5175	460	33000
1842	2016-12-22	20:42:35	2480	5120	460	9000
1843	2016-12-22	20:44:55	2491	5118	457	21000
1844	2016-12-22	21:18:18	2512	5119	457	860
1845	2016-12-22	21:36:22	2469	5084	460	4400
1846	2016-12-22	22:20:05	2549	5237	460	3900
1847	2016-12-22	22:37:12	2526	5125	460	84
1848	2016-12-22	22:37:23	2530	5100	460	42
1849	2016-12-22	22:45:54	2607	5183	457	500
1850	2016-12-22	22:55:20	2508	5100	460	4000
1851	2016-12-22	22:59:14	2520	5123	460	4300
1852	2016-12-22	22:59:39	2521	5170	460	720
1853	2016-12-22	22:59:49	2526	5180	460	2200
1854	2016-12-22	23:03:45	2509	5195	460	62
1855	2016-12-22	23:05:59	2501	5197	460	4400
1856	2016-12-22	23:07:58	2522	5213	457	500
1857	2016-12-22	23:08:34	2500	5125	461	19
1858	2016-12-22	23:08:48	2511	5221	460	280
1859	2016-12-22	23:11:16	2492	5135	457	5300
1860	2016-12-22	23:34:13	2490	5110	460	300
1861	2016-12-22	23:36:23	2499	5097	460	84
1862	2016-12-22	23:45:11	2519	5173	460	470
1863	2016-12-22	23:45:18	2569	5132	460	37
1864	2016-12-22	23:53:23	2508	5163	461	0.76
1865	2016-12-22	23:59:17	2465	5144	457	6600
1866	2016-12-22	23:59:27	2550	5160	460	41
1867	2016-12-23	00:01:34	2378	5140	460	10000
1868	2016-12-23	00:03:43	2490	5120	460	15
1869	2016-12-23	00:29:46	2508	5178	460	2200
1870	2016-12-23	00:31:28	2504	5117	460	110
1871	2016-12-23	00:38:42	2520	5162	460	6200
1872	2016-12-23	00:50:44	2542	5163	460	220
1873	2016-12-23	00:51:44	2619	5229	460	2500
1874	2016-12-23	01:10:27	2575	5181	460	970
1875	2016-12-23	01:23:53	2510	5119	460	4100
1876	2016-12-23	01:24:52	2498	5156	460	220
1877	2016-12-23	01:24:54	2588	5137	460	53
1878	2016-12-23	01:51:42	2508	5160	457	310
1879	2016-12-23	02:11:16	2505	5203	460	1000
1880	2016-12-23	03:15:46	2466	5160	457	73000
1881	2016-12-23	04:07:03	2519	5119	460	79
1882	2016-12-23	04:39:34	2489	5146	457	570
1883	2016-12-23	04:45:24	2539	5160	457	7000
1884	2016-12-23	05:02:38	2513	5112	460	540
1885	2016-12-23	05:18:16	2478	5072	460	120
1886	2016-12-23	05:31:55	2440	5137	460	26
1887	2016-12-23	05:35:36	2605	5185	457	2900
1888	2016-12-23	05:40:15	2489	5118	460	17000
1889	2016-12-23	05:50:37	2490	5129	460	11000000
1890	2016-12-23	05:50:43	2459	5109	460	7300
1891	2016-12-23	05:50:45	2501	5146	460	7700
1892	2016-12-23	05:55:11	2605	5163	457	700
1893	2016-12-23	05:57:48	2569	5160	457	1000
1894	2016-12-23	06:23:49	2489	5220	460	1000
1895	2016-12-23	07:49:30	2440	5100	460	77
1896	2016-12-23	08:25:35	2520	5123	460	5700
1897	2016-12-23	09:04:47	2508	5095	460	770
1898	2016-12-23	09:09:47	2527	5095	460	360
1899	2016-12-23	09:12:43	2470	5100	460	8.5
1900	2016-12-23	09:22:02	2501	5118	460	110
1901	2016-12-23	09:30:31	2539	5118	457	1300
1902	2016-12-23	09:52:11	2478	5118	460	500
1903	2016-12-23	11:05:57	2600	5197	460	67
1904	2016-12-23	11:37:57	2468	5070	457	86
1905	2016-12-23	14:14:50	2459	5183	460	1300
1906	2016-12-23	15:03:36	2470	5080	460	94
1907	2016-12-23	15:10:50	2484	5234	460	1000
1908	2016-12-23	15:27:46	2501	5192	460	2100
1909	2016-12-23	15:55:19	2501	5132	457	89
1910	2016-12-23	15:59:46	2470	5160	460	160
1911	2016-12-23	17:35:22	2550	5169	460	28
1912	2016-12-23	17:59:32	2453	5060	460	330
1913	2016-12-23	18:51:43	2470	5109	460	3900
1914	2016-12-23	18:58:48	2489	5132	457	190
1915	2016-12-23	19:40:53	2478	5146	457	260
1916	2016-12-23	20:37:45	2472	5147	460	12000
1917	2016-12-23	20:42:20	2478	5123	460	270
1918	2016-12-23	20:59:28	2501	5109	460	350
1919	2016-12-23	21:20:16	2459	5063	457	110
1920	2016-12-23	21:21:19	2508	5183	460	59
1921	2016-12-23	21:21:48	2550	5137	460	330
1922	2016-12-23	21:44:17	2520	5206	460	1200
1923	2016-12-23	21:46:20	2459	5192	460	300
1924	2016-12-23	22:08:35	2501	5178	457	64
1925	2016-12-23	22:15:56	2470	5072	460	23
1926	2016-12-23	22:23:57	2501	5197	460	1800
1927	2016-12-23	22:25:21	2470	5146	457	440
1928	2016-12-23	22:51:50	2489	5155	457	190
1929	2016-12-23	23:12:12	2440	5040	460	5000
1930	2016-12-23	23:38:18	2452	5137	457	94
1931	2016-12-23	23:50:05	2409	5072	460	24
1932	2016-12-24	00:05:13	2452	5132	457	1000
1933	2016-12-24	00:47:50	2452	5095	460	560
1934	2016-12-24	01:15:04	2452	5137	460	64
1935	2016-12-24	01:15:26	2459	5206	460	1200
1936	2016-12-24	01:22:10	2440	5109	460	160
1937	2016-12-24	01:48:00	2508	5192	457	210
1938	2016-12-24	03:05:29	2489	5146	460	330
1939	2016-12-24	05:31:20	2459	5118	460	7600
1940	2016-12-24	06:00:13	2440	5160	460	1500
1941	2016-12-24	06:18:41	2470	5169	460	1800
1942	2016-12-24	06:19:24	2501	5118	460	76
1943	2016-12-24	06:19:32	2501	5095	460	77
1944	2016-12-24	06:52:30	2459	5086	460	89
1945	2016-12-24	06:59:53	2440	5169	460	2100
1946	2016-12-24	08:27:32	2427	5020	460	23000
1947	2016-12-24	09:15:02	2501	5155	460	960
1948	2016-12-24	09:25:25	2428	5132	460	260
1949	2016-12-24	09:29:02	2428	5137	460	200
1950	2016-12-24	10:12:32	2452	5034	460	6600
1951	2016-12-24	10:40:12	2459	5109	460	2400
1952	2016-12-24	12:50:17	2452	5100	457	120
1953	2016-12-24	13:50:37	2428	5137	460	51
1954	2016-12-24	14:06:24	2428	5137	460	130
1955	2017-01-02	19:03:52	2398	5109	460	2100
1956	2017-01-03	07:14:25	2428	5049	457	3100
1957	2017-01-03	17:49:09	2545	5123	460	3700
1958	2017-01-03	17:50:25	2400	5032	461	520
1959	2017-01-03	17:52:33	2518	5132	460	3800
1960	2017-01-03	18:09:55	2553	5132	460	11000
1961	2017-01-03	18:09:59	2495	5109	460	220
1962	2017-01-03	18:11:54	2584	5137	460	5100
1963	2017-01-03	19:48:49	2518	5146	460	4300
1964	2017-01-03	20:00:01	2440	5082	460	600
1965	2017-01-04	01:14:12	2473	5137	460	1400
1966	2017-01-04	02:18:45	2520	5132	460	2900
1967	2017-01-04	02:20:53	2539	5160	460	1100
1968	2017-01-04	04:12:16	2468	5093	457	1600
1969	2017-01-04	08:29:56	2460	5178	461	4400
1970	2017-01-04	08:56:12	2490	5123	460	8800
1971	2017-01-04	09:01:39	2451	5123	460	4000
1972	2017-01-04	15:11:16	2458	5072	460	9700
1973	2017-01-04	15:19:40	2479	5141	460	5300
1974	2017-01-04	17:08:06	2461	5093	460	57000
1975	2017-01-04	17:26:47	2451	5095	460	2600
1976	2017-01-04	17:39:53	2576	5137	460	250
1977	2017-01-04	17:52:32	2490	5109	460	3600
1978	2017-01-04	17:54:19	2461	5132	460	2200
1979	2017-01-04	18:09:20	2473	5132	460	3200
1980	2017-01-04	18:31:19	2442	5078	460	1500
1981	2017-01-04	18:44:27	2482	5086	460	1400
1982	2017-01-04	19:16:32	2411	5066	460	660
1983	2017-01-04	21:12:57	2473	5118	460	1700
1984	2017-01-05	01:08:13	2518	5132	460	2400
1985	2017-01-05	01:10:57	2440	5072	460	1500
1986	2017-01-05	01:15:10	2458	5072	460	1200
1987	2017-01-05	01:23:35	2460	5072	460	2100
1988	2017-01-05	01:24:08	2451	5072	460	1200
1989	2017-01-05	01:24:44	2458	5072	460	590
1990	2017-01-05	02:33:08	2504	5095	460	9600
1991	2017-01-05	02:34:40	1497	4634	440	6800
1992	2017-01-05	02:58:00	2451	5072	460	2300
1993	2017-01-05	05:13:01	2520	5138	460	170
1994	2017-01-05	10:04:03	2424	5086	457	6800
1995	2017-01-05	10:04:42	2438	5020	460	880
1996	2017-01-05	12:48:25	2540	5156	460	21000
1997	2017-01-05	12:54:25	2449	5123	460	2400
1998	2017-01-05	14:06:15	2442	5069	460	6400
1999	2017-01-05	14:45:25	2495	5118	460	1500000
[truncated: 11,090 more rows]

## Sheet: AE
Time	Energy
2016-06-02 21:20:00	0
2016-06-02 21:30:00	0
2016-06-02 22:10:00	12088
2016-06-02 22:40:00	0
2016-06-03 16:10:00	0
2016-06-12 11:30:00	0
2016-06-12 13:20:00	0
2016-06-12 13:30:00	0
2016-06-12 15:40:00	0
2016-06-12 15:50:00	0
2016-06-12 16:20:00	0
2016-06-12 18:40:00	0
2016-06-12 19:40:00	0
2016-06-12 20:00:00	0
2016-06-12 20:40:00	0
2016-06-12 21:20:00	11959
2016-06-12 21:50:00	0
2016-06-12 22:00:00	0
2016-06-12 22:20:00	0
2016-06-12 22:40:00	0
2016-06-12 23:20:00	0
2016-06-12 23:30:00	0
2016-06-12 23:40:00	0
2016-06-13 00:20:00	0
2016-06-13 00:40:00	0
2016-06-13 13:00:00	0
2016-06-13 13:10:00	0
2016-06-13 13:20:00	0
2016-06-13 14:10:00	0
2016-06-13 14:20:00	0
2016-06-13 15:50:00	0
2016-06-13 16:00:00	0
2016-06-13 16:20:00	0
2016-06-13 16:40:00	0
2016-06-13 16:50:00	0
2016-06-13 17:00:00	0
2016-06-13 17:10:00	0
2016-06-13 21:40:00	0
2016-06-13 22:00:00	0
2016-06-13 22:30:00	0
2016-06-13 23:10:00	0
2016-06-13 23:30:00	6104
2016-06-13 23:40:00	0
2016-06-13 23:50:00	0
2016-06-14 14:00:00	0
2016-06-14 14:10:00	0
2016-06-14 14:30:00	0
2016-06-14 15:10:00	0
2016-06-14 15:30:00	0
2016-06-14 16:10:00	0
2016-06-14 17:10:00	0
2016-06-14 17:20:00	0
2016-06-14 17:30:00	0
2016-06-14 19:50:00	0
2016-06-14 21:00:00	0
2016-06-14 22:10:00	0
2016-06-14 22:40:00	0
2016-06-14 23:20:00	0
2016-06-14 23:50:00	5874
2016-06-15 00:10:00	0
2016-06-15 00:20:00	0
2016-06-15 00:50:00	0
2016-06-15 03:30:00	0
2016-06-15 07:20:00	0
2016-06-15 13:30:00	0
2016-06-15 13:40:00	0
2016-06-15 14:00:00	0
2016-06-15 14:40:00	0
2016-06-15 15:10:00	0
2016-06-15 15:50:00	0
2016-06-15 16:20:00	0
2016-06-15 16:30:00	0
2016-06-15 16:40:00	0
2016-06-15 17:00:00	12071
2016-06-15 17:20:00	0
2016-06-15 19:30:00	0
2016-06-15 20:00:00	0
2016-06-15 20:10:00	0
2016-06-15 21:10:00	0
2016-06-15 21:20:00	0
2016-06-15 21:30:00	0
2016-06-15 22:40:00	0
2016-06-15 23:10:00	0
2016-06-15 23:20:00	0
2016-06-16	0
2016-06-16 00:30:00	0
2016-06-16 00:40:00	0
2016-06-16 00:50:00	0
2016-06-16 01:00:00	0
2016-06-16 03:20:00	0
2016-06-16 03:40:00	0
2016-06-16 04:00:00	0
2016-06-16 04:20:00	0
2016-06-16 04:30:00	0
2016-06-16 05:10:00	0
2016-06-16 06:10:00	24245
2016-06-16 06:30:00	0
2016-06-16 08:20:00	24080
2016-06-16 09:10:00	0
2016-06-16 09:20:00	0
2016-06-16 12:50:00	0
2016-06-16 13:50:00	0
2016-06-16 14:00:00	0
2016-06-16 14:10:00	0
2016-06-16 14:30:00	0
2016-06-16 15:10:00	0
2016-06-16 15:30:00	0
2016-06-16 15:40:00	0
2016-06-16 15:50:00	0
2016-06-16 16:10:00	0
2016-06-16 16:30:00	0
2016-06-16 16:40:00	0
2016-06-16 17:20:00	0
2016-06-16 19:30:00	0
2016-06-16 19:40:00	0
2016-06-17 03:20:00	0
2016-06-17 03:30:00	0
2016-06-17 03:40:00	0
2016-06-17 04:00:00	0
2016-06-17 05:10:00	0
2016-06-17 05:20:00	0
2016-06-17 05:50:00	0
2016-06-17 06:10:00	0
2016-06-17 06:20:00	0
2016-06-17 06:50:00	0
2016-06-17 07:00:00	0
2016-06-17 07:50:00	24074
2016-06-17 08:20:00	0
2016-06-17 09:30:00	0
2016-06-17 13:00:00	0
2016-06-17 13:10:00	6034
2016-06-17 13:20:00	8947
2016-06-17 13:50:00	0
2016-06-17 14:00:00	0
2016-06-17 14:10:00	0
2016-06-17 14:20:00	4894
2016-06-17 14:30:00	0
2016-06-17 14:40:00	0
2016-06-17 14:50:00	0
2016-06-17 15:00:00	0
2016-06-17 15:10:00	0
2016-06-17 15:30:00	0
2016-06-17 15:40:00	6046
2016-06-17 15:50:00	6036
2016-06-17 16:00:00	0
2016-06-17 16:10:00	0
2016-06-17 16:20:00	0
2016-06-17 16:30:00	0
2016-06-17 16:40:00	6953
2016-06-17 16:50:00	6024
2016-06-17 17:10:00	4004
2016-06-17 17:20:00	0
2016-06-17 17:30:00	0
2016-06-17 17:40:00	0
2016-06-17 19:20:00	3902
2016-06-17 19:30:00	7917
2016-06-17 20:00:00	0
2016-06-17 20:10:00	3936
2016-06-17 20:20:00	12020
2016-06-17 20:30:00	0
2016-06-17 20:40:00	10280
2016-06-17 21:10:00	5782
2016-06-17 21:20:00	0
2016-06-17 21:40:00	0
2016-06-17 21:50:00	0
2016-06-17 22:00:00	0
2016-06-17 22:10:00	0
2016-06-17 22:20:00	7813
2016-06-17 22:30:00	0
2016-06-17 22:50:00	0
2016-06-17 23:00:00	4003
2016-06-17 23:10:00	8066
2016-06-17 23:30:00	0
2016-06-17 23:40:00	6036
2016-06-17 23:50:00	2707
2016-06-18	4021
2016-06-18 00:10:00	0
2016-06-18 00:20:00	0
2016-06-19 12:50:00	24300
2016-06-19 13:10:00	0
2016-06-19 13:30:00	0
2016-06-19 13:50:00	0
2016-06-19 14:20:00	0
2016-06-19 15:20:00	0
2016-06-19 15:50:00	0
2016-06-19 16:10:00	0
2016-06-19 16:40:00	0
2016-06-19 17:00:00	0
2016-06-19 19:30:00	0
2016-06-19 19:40:00	0
2016-06-19 19:50:00	0
2016-06-19 20:00:00	0
2016-06-19 20:20:00	0
2016-06-19 20:40:00	5902
2016-06-19 21:00:00	0
2016-06-19 21:40:00	0
2016-06-22 04:10:00	0
2016-06-22 04:20:00	8122
2016-06-22 04:30:00	0
2016-06-22 04:40:00	0
2016-06-22 04:50:00	0
2016-06-22 05:00:00	0
2016-06-22 05:10:00	0
2016-06-22 05:20:00	0
2016-06-22 05:30:00	0
2016-06-22 05:40:00	0
2016-06-22 05:50:00	0
2016-06-22 06:00:00	0
2016-06-22 06:10:00	0
2016-06-22 06:20:00	0
2016-06-22 06:30:00	0
2016-06-22 06:40:00	0
2016-06-22 06:50:00	0
2016-06-22 07:00:00	0
2016-06-22 07:10:00	0
2016-06-22 08:00:00	0
2016-06-22 08:10:00	0
2016-06-22 08:20:00	0
2016-06-22 08:30:00	0
2016-06-22 08:40:00	0
2016-06-22 10:10:00	6066
2016-06-23 03:00:00	0
2016-06-23 03:40:00	0
2016-06-23 03:50:00	0
2016-06-23 04:10:00	0
2016-06-23 04:20:00	12060
2016-06-23 04:30:00	0
2016-06-23 04:40:00	0
2016-06-23 04:50:00	0
2016-06-23 05:00:00	0
2016-06-23 05:10:00	0
2016-06-23 05:20:00	0
2016-06-23 05:30:00	0
2016-06-23 05:40:00	0
2016-06-23 05:50:00	0
2016-06-23 06:00:00	0
2016-06-23 06:10:00	0
2016-06-23 06:20:00	0
2016-06-23 06:30:00	0
2016-06-23 06:40:00	0
2016-06-23 06:50:00	0
2016-06-23 07:00:00	0
2016-06-23 07:20:00	0
2016-06-23 07:30:00	0
2016-06-23 07:40:00	0
2016-06-23 08:00:00	12076
2016-06-23 08:10:00	0
2016-06-23 08:20:00	0
2016-06-23 08:30:00	0
2016-06-23 08:50:00	0
2016-06-23 11:10:00	0
2016-06-24 13:00:00	0
2016-06-28 14:10:00	0
2016-06-28 19:00:00	0
2016-06-28 19:20:00	0
2016-06-28 19:30:00	0
2016-06-28 19:40:00	0
2016-06-28 20:00:00	0
2016-06-28 20:20:00	0
2016-06-28 20:30:00	0
2016-06-28 20:50:00	0
2016-06-28 21:00:00	0
2016-06-28 22:30:00	0
2016-06-28 23:00:00	24304
2016-06-28 23:50:00	0
2016-06-29 04:00:00	0
2016-06-29 04:50:00	0
2016-06-29 05:00:00	0
2016-06-29 05:10:00	0
2016-06-29 06:30:00	0
2016-06-29 06:40:00	0
2016-06-29 07:00:00	0
2016-06-29 14:30:00	0
2016-06-29 14:50:00	0
2016-06-29 15:10:00	0
2016-06-29 15:30:00	0
2016-06-29 16:00:00	0
2016-06-29 16:50:00	0
2016-06-29 19:10:00	0
2016-06-29 19:30:00	0
2016-06-29 19:40:00	12189
2016-06-29 22:30:00	0
2016-06-29 22:40:00	0
2016-06-29 23:00:00	0
2016-06-29 23:30:00	0
2016-06-29 23:40:00	0
2016-06-30 00:10:00	0
2016-06-30 00:20:00	0
2016-06-30 00:30:00	0
2016-06-30 02:40:00	0
2016-06-30 02:50:00	0
2016-06-30 03:00:00	0
2016-06-30 03:10:00	0
2016-06-30 03:50:00	0
2016-06-30 04:00:00	11955
2016-06-30 04:30:00	0
2016-06-30 05:30:00	0
2016-06-30 05:40:00	0
2016-06-30 07:30:00	0
2016-06-30 07:50:00	0
2016-06-30 08:30:00	0
2016-06-30 08:40:00	0
2016-06-30 08:50:00	0
2016-06-30 09:00:00	0
2016-06-30 13:40:00	0
2016-06-30 14:30:00	0
2016-06-30 14:40:00	0
2016-06-30 15:20:00	0
2016-06-30 15:50:00	0
2016-06-30 16:00:00	0
2016-06-30 16:30:00	0
2016-06-30 16:40:00	0
2016-06-30 16:50:00	0
2016-06-30 17:00:00	0
2016-06-30 19:40:00	0
2016-06-30 20:30:00	24462
2016-06-30 20:50:00	0
2016-06-30 21:20:00	0
2016-06-30 21:30:00	0
2016-06-30 22:00:00	0
2016-06-30 22:30:00	0
2016-06-30 22:40:00	0
2016-06-30 22:50:00	24315
2016-06-30 23:00:00	0
2016-06-30 23:10:00	0
2016-06-30 23:30:00	0
2016-07-01 00:10:00	0
2016-07-01 03:40:00	0
2016-07-01 03:50:00	0
2016-07-01 04:00:00	0
2016-07-01 04:20:00	0
2016-07-01 04:50:00	0
2016-07-01 05:10:00	0
2016-07-01 05:20:00	0
2016-07-01 05:40:00	0
2016-07-01 06:30:00	0
2016-07-01 07:20:00	0
2016-07-01 07:30:00	0
2016-07-01 08:10:00	0
2016-07-02 06:40:00	0
2016-07-04 14:00:00	0
2016-07-04 14:20:00	0
2016-07-04 14:30:00	0
2016-07-04 15:00:00	0
2016-07-04 15:30:00	24424
2016-07-04 15:40:00	0
2016-07-04 16:30:00	0
2016-07-04 17:00:00	0
2016-07-04 19:40:00	0
2016-07-04 20:00:00	0
2016-07-04 20:30:00	0
2016-07-04 21:10:00	0
2016-07-04 21:30:00	0
2016-07-05 03:00:00	0
2016-07-05 03:40:00	0
2016-07-05 04:00:00	0
2016-07-05 04:10:00	0
2016-07-05 05:30:00	0
2016-07-05 06:20:00	0
2016-07-05 06:30:00	0
2016-07-05 07:00:00	0
2016-07-05 07:10:00	0
2016-07-05 07:30:00	0
2016-07-05 07:50:00	0
2016-07-05 08:00:00	0
2016-07-05 08:30:00	0
2016-07-05 08:40:00	0
2016-07-05 12:30:00	0
2016-07-05 13:10:00	0
2016-07-05 13:20:00	0
2016-07-05 13:50:00	0
2016-07-05 15:00:00	0
2016-07-05 15:10:00	24237
2016-07-05 15:20:00	0
2016-07-05 17:00:00	0
2016-07-05 20:50:00	0
2016-07-05 21:50:00	0
2016-07-05 22:00:00	0
2016-07-05 22:10:00	0
2016-07-05 22:20:00	0
2016-07-05 22:30:00	0
2016-07-05 22:40:00	0
2016-07-05 22:50:00	0
2016-07-05 23:20:00	0
2016-07-05 23:30:00	0
2016-07-06 00:10:00	0
2016-07-06 04:10:00	0
2016-07-06 06:00:00	0
2016-07-06 06:10:00	0
2016-07-06 07:10:00	0
2016-07-06 07:40:00	0
2016-07-06 08:00:00	0
2016-07-09 14:30:00	0
2016-07-09 14:40:00	0
2016-07-09 15:10:00	0
2016-07-09 16:00:00	0
2016-07-09 16:10:00	0
2016-07-09 19:10:00	0
2016-07-09 19:30:00	0
2016-07-09 20:00:00	0
2016-07-09 20:10:00	0
2016-07-09 20:30:00	0
2016-07-09 21:00:00	0
2016-07-09 21:10:00	0
2016-07-09 21:40:00	0
2016-07-09 21:50:00	0
2016-07-09 22:40:00	0
2016-07-09 22:50:00	0
2016-07-10	0
2016-07-10 00:10:00	0
2016-07-10 00:20:00	0
2016-07-10 01:00:00	0
2016-07-10 01:10:00	0
2016-07-10 01:40:00	0
2016-07-10 02:20:00	0
2016-07-10 03:10:00	0
2016-07-10 03:20:00	0
2016-07-10 03:40:00	0
2016-07-10 04:20:00	0
2016-07-10 04:30:00	0
2016-07-10 04:50:00	0
2016-07-10 05:00:00	0
2016-07-10 05:10:00	0
2016-07-10 05:30:00	0
2016-07-10 05:50:00	0
2016-07-10 06:00:00	0
2016-07-10 06:10:00	0
2016-07-10 06:20:00	0
2016-07-10 06:30:00	0
2016-07-10 07:00:00	0
2016-07-10 07:50:00	0
2016-07-10 08:10:00	0
2016-07-10 08:20:00	0
2016-07-10 08:30:00	0
2016-07-10 08:40:00	0
2016-07-10 08:50:00	0
2016-07-10 09:10:00	0
2016-07-10 09:20:00	0
2016-07-10 09:30:00	0
2016-07-10 09:40:00	0
2016-07-10 09:50:00	0
2016-07-10 13:20:00	24252
2016-07-10 13:40:00	0
2016-07-10 13:50:00	0
2016-07-10 14:00:00	0
2016-07-10 14:40:00	12073
2016-07-10 14:50:00	0
2016-07-10 15:00:00	0
2016-07-10 15:20:00	12047
2016-07-10 15:40:00	0
2016-07-10 15:50:00	0
2016-07-10 16:00:00	0
2016-07-10 16:10:00	0
2016-07-10 16:20:00	0
2016-07-10 16:50:00	0
2016-07-10 17:00:00	0
2016-07-10 17:10:00	0
2016-07-10 17:20:00	0
2016-07-10 18:00:00	0
2016-07-10 18:40:00	0
2016-07-10 19:00:00	0
2016-07-10 21:20:00	0
2016-07-10 21:30:00	0
2016-07-10 22:10:00	0
2016-07-10 22:20:00	0
2016-07-10 23:10:00	0
2016-07-11 00:20:00	0
2016-07-11 00:30:00	0
2016-07-11 02:10:00	0
2016-07-11 02:20:00	0
2016-07-11 03:20:00	0
2016-07-11 03:30:00	0
2016-07-11 03:40:00	0
2016-07-11 03:50:00	0
2016-07-11 04:00:00	0
2016-07-11 04:20:00	0
2016-07-11 04:40:00	0
2016-07-11 05:00:00	0
2016-07-11 05:10:00	0
2016-07-11 05:20:00	0
2016-07-11 05:30:00	0
2016-07-11 05:40:00	0
2016-07-11 05:50:00	0
2016-07-11 06:10:00	11900
2016-07-11 06:20:00	0
2016-07-11 06:40:00	0
2016-07-11 07:00:00	0
2016-07-11 07:10:00	0
2016-07-11 07:20:00	0
2016-07-11 07:50:00	0
2016-07-11 08:30:00	0
2016-07-11 09:00:00	0
2016-07-11 09:10:00	0
2016-07-11 09:30:00	0
2016-07-11 09:40:00	0
2016-07-11 09:50:00	0
2016-07-11 10:00:00	0
2016-07-11 12:40:00	0
2016-07-11 13:20:00	0
2016-07-11 13:50:00	0
2016-07-11 14:00:00	0
2016-07-11 14:10:00	23816
2016-07-11 14:50:00	0
2016-07-11 15:30:00	0
2016-07-11 16:00:00	0
2016-07-11 16:10:00	0
2016-07-11 16:20:00	0
2016-07-11 16:30:00	0
2016-07-11 17:00:00	0
2016-07-11 18:40:00	24359
2016-07-11 20:10:00	0
2016-07-11 20:40:00	0
2016-07-11 22:20:00	0
2016-07-11 22:30:00	8101
2016-07-11 23:40:00	0
2016-07-12 00:30:00	0
2016-07-12 00:50:00	0
2016-07-12 02:40:00	0
2016-07-12 03:00:00	0
2016-07-12 04:00:00	0
2016-07-12 04:20:00	0
2016-07-12 04:50:00	0
2016-07-12 05:00:00	0
2016-07-12 05:10:00	0
2016-07-12 05:20:00	0
2016-07-12 05:30:00	0
2016-07-12 05:50:00	0
2016-07-12 06:20:00	0
2016-07-12 06:50:00	0
2016-07-12 07:00:00	0
2016-07-12 07:50:00	0
2016-07-12 08:00:00	0
2016-07-12 08:20:00	0
2016-07-12 08:30:00	0
2016-07-12 10:30:00	0
2016-07-12 12:50:00	0
2016-07-12 13:30:00	0
2016-07-12 13:40:00	0
2016-07-12 14:10:00	0
2016-07-12 14:30:00	0
2016-07-12 15:00:00	24444
2016-07-12 15:40:00	0
2016-07-12 15:50:00	0
2016-07-12 16:50:00	0
2016-07-12 17:00:00	0
2016-07-12 19:10:00	0
2016-07-12 19:20:00	0
2016-07-12 20:20:00	0
2016-07-12 20:40:00	0
2016-07-12 20:50:00	0
2016-07-12 21:00:00	24404
2016-07-12 21:10:00	0
2016-07-12 21:40:00	0
2016-07-12 21:50:00	0
2016-07-12 22:30:00	0
2016-07-12 22:40:00	0
2016-07-12 23:10:00	0
2016-07-13 00:10:00	24474
2016-07-13 01:00:00	0
2016-07-13 01:40:00	0
2016-07-13 05:20:00	0
2016-07-13 05:30:00	0
2016-07-13 05:50:00	0
2016-07-13 06:20:00	0
2016-07-13 08:00:00	0
2016-07-13 08:40:00	0
2016-07-13 08:50:00	0
2016-07-13 09:00:00	0
2016-07-13 09:20:00	0
2016-07-13 09:50:00	0
2016-07-13 12:20:00	0
2016-07-13 12:50:00	0
2016-07-13 13:10:00	24298
2016-07-13 13:30:00	0
2016-07-13 13:40:00	0
2016-07-13 13:50:00	0
2016-07-13 14:30:00	0
2016-07-13 15:10:00	0
2016-07-13 15:20:00	0
2016-07-13 15:50:00	0
2016-07-13 16:20:00	0
2016-07-13 16:40:00	0
2016-07-13 18:10:00	0
2016-07-13 18:20:00	0
2016-07-13 19:40:00	0
2016-07-13 19:50:00	0
2016-07-13 20:40:00	0
2016-07-13 21:00:00	0
2016-07-13 21:10:00	24511
2016-07-13 21:30:00	0
2016-07-13 23:40:00	0
2016-07-14 00:10:00	0
2016-07-14 00:20:00	0
2016-07-14 01:50:00	0
2016-07-14 02:40:00	0
2016-07-14 02:50:00	0
2016-07-14 03:00:00	0
2016-07-14 03:10:00	0
2016-07-14 03:20:00	24553
2016-07-14 03:40:00	0
2016-07-14 04:30:00	0
2016-07-14 04:40:00	0
2016-07-14 04:50:00	0
2016-07-14 05:00:00	0
2016-07-14 05:20:00	0
2016-07-14 06:00:00	0
2016-07-14 06:30:00	0
2016-07-14 06:50:00	0
2016-07-14 08:00:00	0
2016-07-14 08:10:00	0
2016-07-14 08:20:00	0
2016-07-14 08:30:00	0
2016-07-14 08:40:00	0
2016-07-14 08:50:00	0
2016-07-14 09:00:00	0
2016-07-14 09:20:00	0
2016-07-14 09:50:00	0
2016-07-14 16:50:00	0
2016-07-14 17:00:00	0
2016-07-14 17:40:00	0
2016-07-14 18:10:00	0
2016-07-14 19:10:00	0
2016-07-14 20:40:00	0
2016-07-14 21:10:00	0
2016-07-14 21:20:00	0
2016-07-14 21:30:00	0
2016-07-14 21:50:00	0
2016-07-14 22:10:00	0
2016-07-14 22:30:00	0
2016-07-14 22:50:00	0
2016-07-14 23:40:00	0
2016-07-15	0
2016-07-15 00:40:00	24296
2016-07-15 01:00:00	0
2016-07-15 01:30:00	0
2016-07-15 03:10:00	0
2016-07-15 03:20:00	0
2016-07-15 03:50:00	0
2016-07-15 04:10:00	24470
2016-07-15 04:40:00	0
2016-07-15 05:20:00	0
2016-07-15 06:00:00	0
2016-07-15 06:20:00	24313
2016-07-15 07:40:00	0
2016-07-15 08:00:00	0
2016-07-15 08:10:00	0
2016-07-15 09:20:00	0
2016-07-15 09:30:00	0
2016-07-15 09:40:00	0
2016-07-15 10:00:00	0
2016-07-15 13:30:00	0
2016-07-15 13:40:00	0
2016-07-15 13:50:00	0
2016-07-15 14:10:00	0
2016-07-15 14:20:00	0
2016-07-15 15:00:00	0
2016-07-15 15:20:00	0
2016-07-15 15:50:00	0
2016-07-15 16:20:00	0
2016-07-15 16:30:00	0
2016-07-15 21:30:00	0
2016-07-15 23:30:00	0
2016-07-15 23:40:00	0
2016-07-16 01:00:00	0
2016-07-16 03:30:00	0
2016-07-16 04:30:00	0
2016-07-16 05:00:00	0
2016-07-16 05:30:00	0
2016-07-16 06:10:00	12100
2016-07-16 06:30:00	0
2016-07-16 07:00:00	0
2016-07-16 07:40:00	0
2016-07-16 08:40:00	0
2016-07-16 09:00:00	0
2016-07-16 09:40:00	0
2016-07-18 13:00:00	0
2016-07-18 14:10:00	24517
2016-07-18 14:40:00	0
2016-07-18 16:00:00	0
2016-07-18 17:30:00	0
2016-07-18 17:40:00	24395
2016-07-18 18:20:00	0
2016-07-18 18:30:00	0
2016-07-18 19:00:00	0
2016-07-18 19:20:00	0
2016-07-18 19:30:00	0
2016-07-18 20:10:00	0
2016-07-18 21:00:00	0
2016-07-18 22:40:00	0
2016-07-18 23:00:00	0
2016-07-18 23:50:00	0
2016-07-19	0
2016-07-19 00:20:00	0
2016-07-19 01:00:00	0
2016-07-19 01:30:00	0
2016-07-19 02:20:00	0
2016-07-19 03:20:00	0
2016-07-19 04:10:00	0
2016-07-19 04:20:00	0
2016-07-19 06:00:00	0
2016-07-19 06:30:00	0
2016-07-19 06:40:00	0
2016-07-19 07:00:00	0
2016-07-19 07:40:00	0
2016-07-19 08:30:00	0
2016-07-19 10:30:00	0
2016-07-19 17:00:00	11871
2016-07-19 17:10:00	0
2016-07-19 18:30:00	0
2016-07-19 19:50:00	12239
2016-07-19 20:00:00	0
2016-07-19 20:10:00	0
2016-07-19 20:50:00	0
2016-07-19 21:10:00	0
2016-07-19 21:20:00	0
2016-07-19 21:40:00	0
2016-07-19 22:10:00	0
2016-07-19 22:20:00	0
2016-07-19 22:40:00	0
2016-07-19 22:50:00	0
2016-07-20 00:20:00	0
2016-07-20 01:00:00	0
2016-07-20 01:10:00	0
2016-07-20 02:10:00	0
2016-07-20 02:30:00	0
2016-07-20 03:10:00	0
2016-07-20 03:20:00	0
2016-07-20 03:40:00	0
2016-07-20 03:50:00	0
2016-07-20 04:20:00	0
2016-07-20 04:40:00	0
2016-07-20 05:00:00	0
2016-07-20 05:50:00	0
2016-07-20 06:00:00	0
2016-07-20 06:10:00	0
2016-07-20 06:30:00	0
2016-07-20 06:40:00	0
2016-07-20 07:00:00	0
2016-07-20 07:20:00	0
2016-07-20 08:00:00	0
2016-07-20 08:20:00	0
2016-07-20 09:00:00	0
2016-07-20 10:40:00	0
2016-07-20 14:30:00	0
2016-07-20 14:50:00	0
2016-07-20 15:10:00	0
2016-07-20 16:00:00	0
2016-07-20 16:10:00	0
2016-07-20 17:40:00	0
2016-07-20 19:30:00	0
2016-07-20 20:40:00	0
2016-07-20 21:00:00	0
2016-07-20 21:40:00	0
2016-07-20 23:50:00	0
2016-07-21	0
2016-07-21 00:20:00	0
2016-07-21 00:50:00	0
2016-07-21 03:00:00	0
2016-07-21 03:10:00	0
2016-07-21 03:20:00	0
2016-07-21 03:40:00	0
2016-07-21 03:50:00	0
2016-07-21 04:00:00	0
2016-07-21 05:30:00	0
2016-07-21 05:50:00	0
2016-07-21 06:00:00	0
2016-07-21 06:50:00	0
2016-07-21 07:10:00	0
2016-07-21 07:40:00	0
2016-07-21 08:00:00	0
2016-07-21 08:10:00	12177
2016-07-21 09:00:00	0
2016-07-21 09:10:00	0
2016-07-21 09:20:00	12286
2016-07-21 09:30:00	0
2016-07-21 09:50:00	0
2016-07-21 10:40:00	0
2016-07-21 13:30:00	0
2016-07-21 13:50:00	0
2016-07-21 14:40:00	0
2016-07-21 15:20:00	0
2016-07-21 15:30:00	0
2016-07-21 17:10:00	0
2016-07-21 18:40:00	0
2016-07-21 19:30:00	0
2016-07-21 19:40:00	0
2016-07-21 19:50:00	0
2016-07-21 20:30:00	0
2016-07-21 20:50:00	0
2016-07-21 21:00:00	0
2016-07-21 22:10:00	0
2016-07-21 22:30:00	0
2016-07-21 22:40:00	0
2016-07-21 23:20:00	0
2016-07-21 23:30:00	0
2016-07-22 00:10:00	0
2016-07-22 00:20:00	0
2016-07-22 00:40:00	0
2016-07-22 00:50:00	0
2016-07-22 03:30:00	12136
2016-07-22 04:00:00	0
2016-07-22 04:30:00	0
2016-07-22 04:40:00	0
2016-07-22 04:50:00	0
2016-07-22 05:30:00	0
2016-07-22 06:00:00	0
2016-07-22 06:20:00	0
2016-07-22 07:30:00	0
2016-07-22 08:00:00	0
2016-07-22 08:10:00	0
2016-07-22 09:20:00	0
2016-07-22 17:20:00	0
2016-07-22 17:30:00	0
2016-07-22 19:00:00	0
2016-07-22 19:20:00	0
2016-07-22 20:20:00	0
2016-07-22 21:30:00	0
2016-07-22 23:20:00	0
2016-07-23 00:20:00	0
2016-07-23 03:20:00	0
2016-07-23 04:20:00	0
2016-07-23 04:30:00	0
2016-07-23 04:40:00	0
2016-07-23 05:10:00	0
2016-07-23 05:40:00	0
2016-07-23 05:50:00	0
2016-07-23 06:20:00	0
2016-07-23 06:30:00	0
2016-07-23 08:10:00	0
2016-07-23 09:00:00	0
2016-07-23 09:20:00	0
2016-07-23 09:50:00	0
2016-07-23 10:00:00	0
2016-07-23 10:30:00	0
2016-07-25 11:10:00	0
2016-07-25 12:50:00	0
2016-07-25 14:10:00	0
2016-07-25 14:50:00	0
2016-07-25 15:30:00	0
2016-07-25 16:10:00	0
2016-07-25 16:50:00	0
2016-07-25 17:40:00	0
2016-07-25 19:20:00	0
2016-07-25 19:50:00	0
2016-07-25 21:10:00	0
2016-07-25 21:20:00	0
2016-07-25 22:10:00	0
2016-07-25 22:20:00	0
2016-07-25 22:40:00	0
2016-07-25 22:50:00	0
2016-07-25 23:00:00	0
2016-07-26 01:30:00	0
2016-07-26 03:30:00	0
2016-07-26 03:40:00	0
2016-07-26 03:50:00	0
2016-07-26 04:00:00	0
2016-07-26 05:10:00	0
2016-07-26 06:10:00	0
2016-07-26 08:50:00	0
2016-07-26 13:10:00	3039
2016-07-26 13:20:00	899
2016-07-26 13:30:00	903
2016-07-26 13:40:00	1279
2016-07-26 13:50:00	1749
2016-07-26 14:00:00	764
2016-07-26 14:10:00	827
2016-07-26 14:20:00	885
2016-07-26 14:30:00	887
2016-07-26 14:40:00	916
2016-07-26 14:50:00	956
2016-07-26 15:00:00	1029
2016-07-26 15:10:00	978
2016-07-26 15:20:00	1047
2016-07-26 15:30:00	969
2016-07-26 15:40:00	968
2016-07-26 15:50:00	910
2016-07-26 16:00:00	872
2016-07-26 16:10:00	1307
2016-07-26 16:20:00	925
2016-07-26 16:30:00	929
2016-07-26 16:40:00	875
2016-07-26 16:50:00	823
2016-07-26 17:00:00	814
2016-07-26 17:10:00	802
2016-07-26 17:20:00	882
2016-07-26 17:30:00	875
2016-07-26 17:40:00	821
2016-07-26 17:50:00	880
2016-07-26 18:00:00	857
2016-07-26 18:10:00	809
2016-07-26 18:20:00	928
2016-07-26 18:30:00	913
2016-07-26 18:40:00	1149
2016-07-26 18:50:00	1203
2016-07-26 19:00:00	1240
2016-07-26 19:10:00	1686
2016-07-26 19:20:00	1529
2016-07-26 19:30:00	1531
2016-07-26 19:40:00	1344
2016-07-26 19:50:00	1417
2016-07-26 20:00:00	1164
2016-07-26 20:10:00	1227
2016-07-26 20:20:00	1490
2016-07-26 20:30:00	1373
2016-07-26 20:40:00	1431
2016-07-26 20:50:00	1135
2016-07-26 21:00:00	1030
2016-07-26 21:10:00	1216
2016-07-26 21:20:00	1336
2016-07-26 21:30:00	1444
2016-07-26 21:40:00	1229
2016-07-26 21:50:00	1314
2016-07-26 22:00:00	1385
2016-07-26 22:10:00	751
2016-07-26 22:20:00	631
2016-07-26 22:30:00	799
2016-07-26 22:40:00	857
2016-07-26 22:50:00	1572
2016-07-26 23:00:00	1313
2016-07-26 23:10:00	1326
2016-07-26 23:20:00	1245
2016-07-26 23:30:00	1953
2016-07-26 23:40:00	1904
2016-07-26 23:50:00	2582
2016-07-27	2685
2016-07-27 00:10:00	775
2016-07-27 00:20:00	986
2016-07-27 00:30:00	958
2016-07-27 00:40:00	1233
2016-07-27 00:50:00	1273
2016-07-27 01:00:00	1103
2016-07-27 01:10:00	922
2016-07-27 01:20:00	902
2016-07-27 01:30:00	845
2016-07-27 01:40:00	757
2016-07-27 01:50:00	824
2016-07-27 02:00:00	738
2016-07-27 02:10:00	817
2016-07-27 02:20:00	769
2016-07-27 02:30:00	863
2016-07-27 02:40:00	970
2016-07-27 02:50:00	1187
2016-07-27 03:00:00	1035
2016-07-27 03:10:00	1395
2016-07-27 03:20:00	1406
2016-07-27 03:30:00	1566
2016-07-27 03:40:00	1146
2016-07-27 03:50:00	1466
2016-07-27 04:00:00	1464
2016-07-27 04:10:00	1326
2016-07-27 04:20:00	1226
2016-07-27 04:30:00	1557
2016-07-27 04:40:00	1235
2016-07-27 04:50:00	1254
2016-07-27 05:00:00	1535
2016-07-27 05:10:00	1052
2016-07-27 05:20:00	1053
2016-07-27 05:30:00	1077
2016-07-27 05:40:00	1526
2016-07-27 05:50:00	1558
2016-07-27 06:00:00	1594
2016-07-27 06:10:00	1204
2016-07-27 06:20:00	935
2016-07-27 06:30:00	819
2016-07-27 06:40:00	1249
2016-07-27 06:50:00	1118
2016-07-27 07:00:00	1151
2016-07-27 07:10:00	1250
2016-07-27 07:20:00	922
2016-07-27 07:30:00	1099
2016-07-27 07:40:00	1209
2016-07-27 07:50:00	983
2016-07-27 08:00:00	867
2016-07-27 08:10:00	851
2016-07-27 08:20:00	784
2016-07-27 08:30:00	821
2016-07-27 08:40:00	1007
2016-07-27 08:50:00	907
2016-07-27 09:00:00	854
2016-07-27 09:10:00	601
2016-07-27 09:20:00	549
2016-07-27 09:30:00	678
2016-07-27 09:40:00	881
2016-07-27 09:50:00	615
2016-07-27 10:00:00	590
2016-07-27 10:10:00	668
2016-07-27 10:20:00	570
2016-07-27 10:30:00	738
2016-07-27 10:40:00	612
2016-07-27 10:50:00	596
2016-07-27 11:00:00	452
2016-07-27 11:10:00	423
2016-07-27 11:20:00	393
2016-07-27 11:30:00	393
2016-07-27 11:40:00	460
2016-07-27 11:50:00	334
2016-07-27 12:00:00	581
2016-07-27 12:10:00	497
2016-07-27 12:20:00	422
2016-07-27 12:30:00	291
2016-07-27 12:40:00	215
2016-07-27 12:50:00	264
2016-07-27 13:00:00	349
2016-07-27 13:10:00	233
2016-07-27 13:20:00	23
2016-07-27 13:30:00	23
2016-07-27 13:40:00	23
2016-07-27 13:50:00	23
2016-07-27 14:00:00	23
2016-07-27 14:10:00	23
2016-07-27 14:20:00	23
2016-07-27 14:30:00	23
2016-07-27 14:40:00	23
2016-07-28 13:20:00	0
2016-07-28 15:40:00	24
2016-07-28 15:50:00	24
2016-07-28 16:50:00	25
2016-07-28 18:00:00	56
2016-07-28 18:10:00	23
2016-07-28 18:20:00	197
2016-07-28 18:30:00	23
2016-07-28 18:40:00	216
2016-07-28 18:50:00	63
2016-07-28 19:00:00	140
2016-07-28 19:10:00	23
2016-07-28 19:20:00	23
2016-07-28 19:30:00	814
2016-07-28 19:40:00	423
2016-07-28 19:50:00	66
2016-07-28 20:00:00	275
2016-07-28 20:10:00	28
2016-07-28 20:20:00	337
2016-07-28 20:30:00	1589
2016-07-28 20:40:00	680
2016-07-28 20:50:00	860
2016-07-28 21:00:00	990
2016-07-28 21:10:00	171
2016-07-28 21:20:00	1450
2016-07-28 21:30:00	1153
2016-07-28 21:40:00	448
2016-07-28 21:50:00	454
2016-07-28 22:00:00	297
2016-07-28 22:10:00	64
2016-07-28 22:20:00	444
2016-07-28 22:30:00	1140
2016-07-28 22:40:00	789
2016-07-28 22:50:00	1244
2016-07-28 23:00:00	1225
2016-07-28 23:10:00	1206
2016-07-28 23:20:00	605
2016-07-28 23:30:00	247
2016-07-28 23:40:00	178
2016-07-28 23:50:00	175
2016-07-29	159
2016-07-29 00:10:00	187
2016-07-29 00:20:00	491
2016-07-29 00:30:00	208
2016-07-29 00:40:00	23
2016-07-29 00:50:00	23
2016-07-29 01:00:00	114
2016-07-29 01:10:00	531
2016-07-29 01:20:00	32
2016-07-29 01:30:00	318
2016-07-29 01:40:00	385
2016-07-29 01:50:00	324
2016-07-29 02:00:00	434
2016-07-29 02:10:00	696
2016-07-29 02:20:00	835
2016-07-29 02:30:00	165
2016-07-29 02:40:00	966
2016-07-29 02:50:00	1038
2016-07-29 03:00:00	1399
2016-07-29 03:10:00	1444
2016-07-29 03:20:00	748
2016-07-29 03:30:00	743
2016-07-29 03:40:00	490
2016-07-29 03:50:00	431
2016-07-29 04:00:00	1129
2016-07-29 04:10:00	878
2016-07-29 04:20:00	581
2016-07-29 04:30:00	196
2016-07-29 04:40:00	1012
2016-07-29 04:50:00	1257
2016-07-29 05:00:00	1144
2016-07-29 05:10:00	678
2016-07-29 05:20:00	737
2016-07-29 05:30:00	829
2016-07-29 05:40:00	1101
2016-07-29 05:50:00	1410
2016-07-29 06:00:00	908
2016-07-29 06:10:00	644
2016-07-29 06:20:00	825
2016-07-29 06:30:00	1463
2016-07-29 06:40:00	1579
2016-07-29 06:50:00	1062
2016-07-29 07:00:00	518
2016-07-29 07:10:00	917
2016-07-29 07:20:00	809
2016-07-29 07:30:00	859
2016-07-29 07:40:00	661
2016-07-29 07:50:00	225
2016-07-29 08:00:00	822
2016-07-29 08:10:00	721
2016-07-29 08:20:00	1409
2016-07-29 08:30:00	1832
2016-07-29 08:40:00	1840
2016-07-29 08:50:00	1572
2016-07-29 09:00:00	395
2016-07-29 09:10:00	430
2016-07-29 09:20:00	636
2016-07-29 09:30:00	584
2016-07-29 09:40:00	293
2016-07-29 09:50:00	475
2016-07-29 10:00:00	104
2016-07-29 10:10:00	147
2016-07-29 10:20:00	122
2016-07-29 10:30:00	129
2016-07-29 10:40:00	191
2016-07-29 10:50:00	196
2016-07-29 11:00:00	77
2016-07-29 11:10:00	173
2016-07-29 11:20:00	100
2016-07-29 11:30:00	149
2016-07-29 11:40:00	93
2016-07-29 11:50:00	173
2016-07-29 12:00:00	182
2016-07-29 12:10:00	129
2016-07-29 12:20:00	87
2016-07-29 12:30:00	63
2016-07-29 12:40:00	312
2016-07-29 12:50:00	228
2016-07-29 13:00:00	191
2016-07-29 13:10:00	197
2016-07-29 13:20:00	208
2016-07-29 13:30:00	214
2016-07-29 13:40:00	249
2016-07-29 13:50:00	249
2016-07-29 14:00:00	353
2016-07-29 14:10:00	374
2016-07-29 14:20:00	268
2016-07-29 14:30:00	265
2016-07-29 14:40:00	152
2016-07-29 14:50:00	171
2016-07-29 15:00:00	290
2016-07-29 15:10:00	338
2016-07-29 15:20:00	233
2016-07-29 15:30:00	178
2016-07-29 15:40:00	122
2016-07-29 18:50:00	1392
2016-07-29 19:40:00	2296
2016-07-29 19:50:00	728
2016-07-29 20:00:00	122
2016-07-30 03:00:00	108
2016-08-01 11:40:00	65
2016-08-01 11:50:00	54
2016-08-01 12:00:00	96
2016-08-01 12:10:00	40
2016-08-01 12:20:00	76
2016-08-01 12:30:00	53
2016-08-01 12:40:00	46
2016-08-01 12:50:00	52
2016-08-01 13:10:00	75
2016-08-01 13:40:00	1033
2016-08-01 15:50:00	47
2016-08-01 18:30:00	862
2016-08-01 19:00:00	3484
2016-08-01 19:10:00	28
2016-08-01 19:20:00	158
2016-08-01 19:30:00	45
2016-08-01 20:10:00	40
2016-08-01 20:20:00	254
2016-08-01 20:30:00	35
2016-08-01 20:40:00	34
2016-08-01 21:10:00	49
2016-08-01 21:20:00	97
2016-08-01 22:00:00	61
2016-08-01 23:00:00	23
2016-08-01 23:10:00	25
2016-08-01 23:30:00	48
2016-08-01 23:50:00	48
2016-08-02	50
2016-08-02 00:10:00	62
2016-08-02 00:30:00	53
2016-08-02 00:50:00	26
2016-08-02 01:50:00	23
2016-08-02 02:00:00	689
2016-08-02 02:20:00	31
2016-08-02 02:30:00	51
2016-08-02 02:40:00	52
2016-08-02 06:30:00	214
2016-08-02 07:20:00	85
2016-08-02 07:40:00	85
2016-08-02 09:20:00	633
2016-08-02 10:10:00	1570
2016-08-02 10:20:00	2271
2016-08-02 10:40:00	50
2016-08-02 10:50:00	44
2016-08-02 11:00:00	22
2016-08-02 11:20:00	51
2016-08-02 11:30:00	57
2016-08-02 11:40:00	92
2016-08-02 11:50:00	61
2016-08-02 12:00:00	29
2016-08-02 12:10:00	25
2016-08-02 12:30:00	44
2016-08-02 12:40:00	97
2016-08-02 12:50:00	53
2016-08-02 13:00:00	50
2016-08-02 13:10:00	43
2016-08-02 13:20:00	138
2016-08-02 13:30:00	44
2016-08-02 14:00:00	107
2016-08-02 14:10:00	105
2016-08-02 14:20:00	110
2016-08-03 04:00:00	0
2016-08-03 06:50:00	986
2016-08-03 07:10:00	0
2016-08-03 18:20:00	14517
2016-08-04 14:10:00	190
2016-08-04 14:20:00	1525
2016-08-04 17:40:00	6700
2016-08-04 20:00:00	20
2016-08-04 20:30:00	0
2016-08-04 21:20:00	0
2016-08-04 21:40:00	0
2016-08-05 06:10:00	521
2016-08-05 06:20:00	63
2016-08-05 07:10:00	0
2016-08-05 07:30:00	0
2016-08-12 16:00:00	2509
2016-08-12 16:10:00	2422
2016-08-12 16:20:00	2749
2016-08-12 16:30:00	2482
2016-08-12 16:40:00	2649
2016-08-12 16:50:00	2707
2016-08-12 17:00:00	2645
2016-08-12 17:10:00	2580
2016-08-12 17:20:00	2457
2016-08-12 17:30:00	2562
2016-08-12 17:40:00	2532
2016-08-12 17:50:00	2356
2016-08-12 18:00:00	2727
2016-08-12 18:10:00	2371
2016-08-12 18:20:00	1694
2016-08-12 18:30:00	1871
2016-08-12 18:40:00	2343
2016-08-12 18:50:00	2918
2016-08-12 19:00:00	2632
2016-08-12 19:10:00	2845
2016-08-12 19:20:00	2663
2016-08-12 19:30:00	2704
2016-08-12 19:40:00	2573
2016-08-12 19:50:00	2622
2016-08-12 20:00:00	2785
2016-08-12 20:10:00	1903
2016-08-12 20:20:00	2047
2016-08-12 20:30:00	2289
2016-08-12 20:40:00	2372
2016-08-12 20:50:00	2149
2016-08-12 21:00:00	2205
2016-08-12 21:10:00	2556
2016-08-12 21:20:00	2977
2016-08-12 21:30:00	2694
2016-08-12 21:40:00	2803
2016-08-12 21:50:00	2690
2016-08-12 22:00:00	2576
2016-08-12 22:10:00	2708
2016-08-12 22:20:00	2834
2016-08-12 22:30:00	3268
2016-08-12 22:40:00	3102
2016-08-12 22:50:00	2868
2016-08-12 23:00:00	2711
2016-08-12 23:10:00	2589
2016-08-12 23:20:00	2466
2016-08-12 23:30:00	2547
2016-08-12 23:40:00	2610
2016-08-12 23:50:00	2602
2016-08-13	2631
2016-08-13 00:10:00	2643
2016-08-13 00:20:00	2846
2016-08-13 00:30:00	2959
2016-08-13 00:40:00	2488
2016-08-13 00:50:00	2637
2016-08-13 01:00:00	4811
2016-08-13 01:10:00	4381
2016-08-13 01:20:00	3883
2016-08-13 01:30:00	2532
2016-08-13 01:40:00	2342
2016-08-13 01:50:00	2373
2016-08-13 02:00:00	2445
2016-08-13 02:10:00	2418
2016-08-13 02:20:00	2465
2016-08-13 02:30:00	2582
2016-08-13 02:40:00	2654
2016-08-13 02:50:00	2656
2016-08-13 03:00:00	2379
2016-08-13 03:10:00	2836
2016-08-13 03:20:00	2335
2016-08-13 03:30:00	2718
2016-08-13 03:40:00	2452
2016-08-13 03:50:00	2561
2016-08-13 04:00:00	2786
2016-08-13 04:10:00	2688
2016-08-13 04:20:00	2606
2016-08-13 04:30:00	2522
2016-08-13 04:40:00	2368
2016-08-13 04:50:00	2503
2016-08-13 05:00:00	2578
2016-08-13 05:10:00	2661
2016-08-13 05:20:00	2668
2016-08-13 05:30:00	2608
2016-08-13 05:40:00	2759
2016-08-13 05:50:00	2787
2016-08-13 06:00:00	2662
2016-08-13 06:10:00	2729
2016-08-13 06:20:00	2596
2016-08-13 06:30:00	2604
2016-08-13 06:40:00	2598
2016-08-13 06:50:00	2763
2016-08-13 07:00:00	2752
2016-08-13 07:10:00	2860
2016-08-13 07:20:00	2628
2016-08-13 07:30:00	2520
2016-08-13 07:40:00	2625
2016-08-13 07:50:00	2655
2016-08-13 08:00:00	2622
2016-08-13 08:10:00	2618
2016-08-13 08:20:00	2613
2016-08-13 08:30:00	2533
2016-08-13 08:40:00	2655
2016-08-13 08:50:00	2788
2016-08-13 09:00:00	2573
2016-08-13 09:10:00	2623
2016-08-13 09:20:00	2695
2016-08-13 09:30:00	2695
2016-08-13 09:40:00	2649
2016-08-13 09:50:00	2527
2016-08-13 10:00:00	2675
2016-08-13 10:10:00	2697
2016-08-13 10:20:00	2702
2016-08-13 10:30:00	2939
2016-08-13 10:40:00	3172
2016-08-13 10:50:00	2868
2016-08-13 11:00:00	3517
2016-08-13 11:10:00	2587
2016-08-13 11:20:00	2685
2016-08-13 11:30:00	2661
2016-08-13 11:40:00	2751
2016-08-13 11:50:00	3001
2016-08-13 12:00:00	3161
2016-08-13 12:10:00	2901
2016-08-13 12:20:00	2794
2016-08-13 12:30:00	2657
2016-08-13 12:40:00	2698
2016-08-13 12:50:00	2685
2016-08-13 13:00:00	3203
2016-08-13 13:10:00	2712
2016-08-13 13:20:00	5291
2016-08-13 13:30:00	4025
2016-08-13 13:40:00	5728
2016-08-13 13:50:00	5598
2016-08-13 14:00:00	5791
2016-08-13 14:10:00	4338
2016-08-13 14:20:00	3725
2016-08-13 14:30:00	4877
2016-08-13 14:40:00	4895
2016-08-13 14:50:00	5729
2016-08-13 15:00:00	6020
2016-08-13 15:10:00	3660
2016-08-13 15:20:00	3116
2016-08-13 15:30:00	5823
2016-08-13 15:40:00	6489
2016-08-13 15:50:00	5092
2016-08-13 16:00:00	2663
2016-08-13 16:10:00	2738
2016-08-13 16:20:00	3310
2016-08-13 16:30:00	3746
2016-08-13 16:40:00	2681
2016-08-13 16:50:00	5348
2016-08-13 17:00:00	6288
2016-08-13 17:10:00	6019
2016-08-13 17:20:00	5359
2016-08-13 17:30:00	4177
2016-08-13 17:40:00	4920
2016-08-13 17:50:00	4835
2016-08-13 18:00:00	5209
2016-08-13 18:10:00	5456
2016-08-13 18:20:00	3096
2016-08-13 18:30:00	2913
2016-08-13 18:40:00	4663
2016-08-13 18:50:00	4916
2016-08-13 19:00:00	5541
2016-08-13 19:10:00	6498
2016-08-13 19:20:00	5840
2016-08-13 19:30:00	6701
2016-08-13 19:40:00	5297
2016-08-13 19:50:00	5411
2016-08-13 20:00:00	4926
2016-08-13 20:10:00	5572
2016-08-13 20:20:00	6869
2016-08-13 20:30:00	6550
2016-08-13 20:40:00	6875
2016-08-13 20:50:00	4024
2016-08-13 21:00:00	5567
2016-08-13 21:10:00	5059
2016-08-13 21:20:00	4522
2016-08-13 21:30:00	5487
2016-08-13 21:40:00	6362
2016-08-13 21:50:00	4927
2016-08-13 22:00:00	6199
2016-08-13 22:10:00	4548
2016-08-13 22:20:00	3305
2016-08-13 22:30:00	6383
2016-08-13 22:40:00	5229
2016-08-13 22:50:00	5922
2016-08-13 23:00:00	6185
2016-08-13 23:10:00	5095
2016-08-13 23:20:00	3774
2016-08-13 23:30:00	5552
2016-08-13 23:40:00	6300
2016-08-13 23:50:00	6579
2016-08-14	5462
2016-08-14 00:10:00	5022
2016-08-14 00:20:00	3396
2016-08-14 00:30:00	2699
2016-08-14 00:40:00	2613
2016-08-14 00:50:00	2623
2016-08-14 01:00:00	2620
2016-08-14 01:10:00	2647
2016-08-14 01:20:00	2651
2016-08-14 01:30:00	2672
2016-08-14 01:40:00	2613
2016-08-14 01:50:00	2671
2016-08-14 02:00:00	2642
2016-08-14 02:10:00	2644
2016-08-14 02:20:00	2597
2016-08-14 02:30:00	2635
2016-08-14 02:40:00	3046
2016-08-14 02:50:00	5361
2016-08-14 03:00:00	5737
2016-08-14 03:10:00	6566
2016-08-14 03:20:00	6094
2016-08-14 03:30:00	6344
2016-08-14 03:40:00	6150
2016-08-14 03:50:00	6042
2016-08-14 04:00:00	4853
2016-08-14 04:10:00	4806
2016-08-14 04:20:00	6228
2016-08-14 04:30:00	5433
2016-08-14 04:40:00	5155
2016-08-14 04:50:00	5467
2016-08-14 05:00:00	6311
2016-08-14 05:10:00	4461
2016-08-14 05:20:00	3025
2016-08-14 05:30:00	5055
2016-08-14 05:40:00	5769
2016-08-14 05:50:00	5764
2016-08-14 06:00:00	4444
2016-08-14 06:10:00	3289
2016-08-14 06:20:00	5805
2016-08-14 06:30:00	6423
2016-08-14 06:40:00	6397
2016-08-14 06:50:00	6492
2016-08-14 07:00:00	6402
2016-08-14 07:10:00	6380
2016-08-14 07:20:00	6491
2016-08-14 07:30:00	6008
2016-08-14 07:40:00	2929
2016-08-14 07:50:00	3679
2016-08-14 08:00:00	4511
2016-08-14 08:10:00	2904
2016-08-14 08:20:00	4662
2016-08-14 08:30:00	5051
2016-08-14 08:40:00	5221
2016-08-14 08:50:00	5232
2016-08-14 09:00:00	5255
2016-08-14 09:10:00	5244
2016-08-14 09:20:00	5144
2016-08-14 09:30:00	5578
2016-08-14 09:40:00	5204
2016-08-14 09:50:00	5197
2016-08-14 10:00:00	5132
2016-08-14 10:10:00	4893
2016-08-14 10:20:00	3562
2016-08-14 10:30:00	2875
2016-08-14 10:40:00	2802
2016-08-14 10:50:00	2782
2016-08-14 11:00:00	4018
2016-08-14 11:10:00	4338
2016-08-14 11:20:00	2820
2016-08-14 11:30:00	2867
2016-08-14 11:40:00	2866
2016-08-14 11:50:00	2939
2016-08-14 12:00:00	3659
2016-08-14 12:10:00	3368
2016-08-14 12:20:00	3868
2016-08-14 12:30:00	4161
2016-08-14 12:40:00	5256
2016-08-14 12:50:00	4894
2016-08-14 13:00:00	4727
2016-08-14 13:10:00	6037
2016-08-14 13:20:00	6109
2016-08-14 13:30:00	6658
2016-08-14 13:40:00	2958
2016-08-14 13:50:00	3463
2016-08-14 14:00:00	4261
2016-08-14 14:10:00	2773
2016-08-14 14:20:00	2809
2016-08-14 14:30:00	5511
2016-08-14 14:40:00	5343
2016-08-14 14:50:00	6827
2016-08-14 15:00:00	6429
2016-08-14 15:10:00	6308
2016-08-14 15:20:00	5958
2016-08-14 15:30:00	4549
2016-08-14 15:40:00	4050
2016-08-14 15:50:00	2979
2016-08-14 16:00:00	3148
2016-08-14 16:10:00	2721
2016-08-14 16:20:00	4407
2016-08-14 16:30:00	3380
2016-08-14 16:40:00	4987
2016-08-14 16:50:00	6649
2016-08-14 17:00:00	6668
2016-08-14 17:10:00	5585
2016-08-14 17:20:00	5675
2016-08-14 17:30:00	3235
2016-08-14 17:40:00	2779
2016-08-14 17:50:00	2804
2016-08-14 18:00:00	2729
2016-08-14 18:10:00	2720
2016-08-14 18:20:00	2683
2016-08-14 18:30:00	2743
2016-08-14 18:40:00	4196
2016-08-14 18:50:00	4962
2016-08-14 19:00:00	6120
2016-08-14 19:10:00	6393
2016-08-14 19:20:00	6347
2016-08-14 19:30:00	4057
2016-08-14 19:40:00	2840
2016-08-14 19:50:00	3416
2016-08-14 20:00:00	5233
2016-08-14 20:10:00	5205
2016-08-14 20:20:00	4856
2016-08-14 20:30:00	5153
2016-08-14 20:40:00	4638
2016-08-14 20:50:00	5256
2016-08-14 21:00:00	5207
2016-08-14 21:10:00	5007
2016-08-14 21:20:00	5650
2016-08-14 21:30:00	6529
2016-08-14 21:40:00	5695
2016-08-14 21:50:00	4604
2016-08-14 22:00:00	4683
2016-08-14 22:10:00	5017
2016-08-14 22:20:00	5497
2016-08-14 22:30:00	6200
2016-08-14 22:40:00	5813
2016-08-14 22:50:00	6184
2016-08-14 23:00:00	6719
2016-08-14 23:10:00	6813
2016-08-14 23:20:00	7020
2016-08-14 23:30:00	6947
2016-08-14 23:40:00	6777
2016-08-14 23:50:00	5632
2016-08-15	5362
2016-08-15 00:10:00	5307
2016-08-15 00:20:00	3503
2016-08-15 00:30:00	5505
2016-08-15 00:40:00	3647
2016-08-15 00:50:00	2835
2016-08-15 01:00:00	2751
2016-08-15 01:10:00	2770
2016-08-15 01:20:00	2965
2016-08-15 01:30:00	2869
2016-08-15 01:40:00	2743
2016-08-15 01:50:00	2708
2016-08-15 02:00:00	2733
2016-08-15 02:10:00	2970
2016-08-15 02:20:00	2866
2016-08-15 02:30:00	2826
2016-08-15 02:40:00	2899
2016-08-15 02:50:00	3792
2016-08-15 03:00:00	5920
2016-08-15 03:10:00	5396
2016-08-15 03:20:00	4200
2016-08-15 03:30:00	5867
2016-08-15 03:40:00	3665
2016-08-15 03:50:00	2635
2016-08-15 04:00:00	3006
2016-08-15 04:10:00	4888
2016-08-15 04:20:00	5096
2016-08-15 04:30:00	6367
2016-08-15 04:40:00	6857
2016-08-15 04:50:00	5823
2016-08-15 05:00:00	5914
2016-08-15 05:10:00	6200
2016-08-15 05:20:00	6048
2016-08-15 05:30:00	6009
2016-08-15 05:40:00	6176
2016-08-15 05:50:00	6531
2016-08-15 06:00:00	6138
2016-08-15 06:10:00	5883
2016-08-15 06:20:00	3015
2016-08-15 06:30:00	3964
2016-08-15 06:40:00	6798
2016-08-15 06:50:00	6525
2016-08-15 07:00:00	6330
2016-08-15 07:10:00	7109
2016-08-15 07:20:00	7033
2016-08-15 07:30:00	6879
2016-08-15 07:40:00	6134
2016-08-15 07:50:00	6631
2016-08-15 08:00:00	6133
2016-08-15 08:10:00	6246
2016-08-15 08:20:00	5230
2016-08-15 08:30:00	5483
2016-08-15 08:40:00	3828
2016-08-15 08:50:00	5604
2016-08-15 09:00:00	5412
2016-08-15 09:10:00	6484
2016-08-15 09:20:00	5465
2016-08-15 09:30:00	5029
2016-08-15 09:40:00	5687
2016-08-15 09:50:00	6146
2016-08-15 10:00:00	4236
2016-08-15 10:10:00	4180
2016-08-15 10:20:00	3275
2016-08-15 10:30:00	2719
2016-08-15 10:40:00	2699
2016-08-15 10:50:00	2643
2016-08-15 11:00:00	4149
2016-08-15 11:10:00	4228
2016-08-15 11:20:00	3780
2016-08-15 11:30:00	3695
2016-08-15 11:40:00	3722
2016-08-15 11:50:00	2692
2016-08-15 12:00:00	2710
2016-08-15 12:10:00	2743
2016-08-15 12:20:00	2764
2016-08-15 12:30:00	2750
2016-08-15 12:40:00	3100
2016-08-15 12:50:00	2797
2016-08-15 13:00:00	2824
2016-08-15 13:10:00	3272
2016-08-15 13:20:00	3010
2016-08-15 13:30:00	2802
2016-08-15 13:40:00	3135
2016-08-15 13:50:00	3458
2016-08-15 14:00:00	2968
2016-08-15 14:10:00	2752
2016-08-15 14:20:00	2756
2016-08-15 14:30:00	2686
2016-08-15 14:40:00	2676
2016-08-15 14:50:00	2832
2016-08-15 15:00:00	2792
2016-08-15 15:10:00	2774
2016-08-15 15:20:00	2803
2016-08-15 15:30:00	2907
2016-08-15 15:40:00	4389
2016-08-15 15:50:00	4946
2016-08-15 16:00:00	4344
2016-08-15 16:10:00	5138
2016-08-15 16:20:00	6239
2016-08-15 16:30:00	6446
2016-08-15 16:40:00	6693
2016-08-15 16:50:00	5838
2016-08-15 17:00:00	2943
2016-08-15 17:10:00	2804
2016-08-15 17:20:00	2822
2016-08-15 17:30:00	2797
2016-08-15 17:40:00	3469
2016-08-15 17:50:00	2703
2016-08-15 18:00:00	4035
2016-08-15 18:10:00	3084
2016-08-15 18:20:00	2717
2016-08-15 18:30:00	2876
2016-08-15 18:40:00	3505
2016-08-15 18:50:00	5576
2016-08-15 19:00:00	6419
2016-08-15 19:10:00	6316
2016-08-15 19:20:00	5803
2016-08-15 19:30:00	7011
2016-08-15 19:40:00	6460
2016-08-15 19:50:00	5489
2016-08-15 20:00:00	5497
2016-08-15 20:10:00	4966
2016-08-15 20:20:00	4982
2016-08-15 20:30:00	6286
2016-08-15 20:40:00	6534
2016-08-15 20:50:00	6620
2016-08-15 21:00:00	4000
2016-08-15 21:10:00	2741
2016-08-15 21:20:00	4826
2016-08-15 21:30:00	5948
2016-08-15 21:40:00	4502
2016-08-15 21:50:00	3019
2016-08-15 22:00:00	5988
2016-08-15 22:10:00	5598
2016-08-15 22:20:00	6120
2016-08-15 22:30:00	2886
2016-08-15 22:40:00	2764
2016-08-15 22:50:00	2714
2016-08-15 23:00:00	2771
2016-08-15 23:10:00	2997
2016-08-15 23:20:00	2647
2016-08-15 23:30:00	2708
2016-08-15 23:40:00	2680
2016-08-15 23:50:00	2629
2016-08-16	2714
2016-08-16 00:10:00	2761
2016-08-16 00:20:00	2796
2016-08-16 00:30:00	2841
2016-08-16 00:40:00	2919
2016-08-16 00:50:00	3167
2016-08-16 01:00:00	4985
2016-08-16 01:10:00	5086
2016-08-16 01:20:00	4598
2016-08-16 01:30:00	3762
2016-08-16 01:40:00	2846
2016-08-16 01:50:00	3232
2016-08-16 02:00:00	2775
2016-08-16 02:10:00	2769
2016-08-16 02:20:00	2799
2016-08-16 02:30:00	2789
2016-08-16 02:40:00	2747
2016-08-16 02:50:00	2706
2016-08-16 03:00:00	4977
2016-08-16 03:10:00	4693
2016-08-16 03:20:00	6105
2016-08-16 03:30:00	5613
2016-08-16 03:40:00	5975
2016-08-16 03:50:00	5958
2016-08-16 04:00:00	5919
2016-08-16 04:10:00	5844
2016-08-16 04:20:00	6121
2016-08-16 04:30:00	5475
2016-08-16 04:40:00	5679
2016-08-16 04:50:00	5971
2016-08-16 05:00:00	5420
2016-08-16 05:10:00	2924
2016-08-16 05:20:00	3288
2016-08-16 05:30:00	4696
2016-08-16 05:40:00	4680
2016-08-16 05:50:00	4448
2016-08-16 06:00:00	5340
2016-08-16 06:10:00	5611
2016-08-16 06:20:00	5667
2016-08-16 06:30:00	6227
2016-08-16 06:40:00	6021
2016-08-16 06:50:00	6090
2016-08-16 07:00:00	5835
2016-08-16 07:10:00	6121
2016-08-16 07:20:00	6066
2016-08-16 07:30:00	6048
2016-08-16 07:40:00	5559
2016-08-16 07:50:00	5895
2016-08-16 08:00:00	4274
2016-08-16 08:10:00	6086
2016-08-16 08:20:00	5204
2016-08-16 08:30:00	5070
2016-08-16 08:40:00	4743
2016-08-16 08:50:00	4892
2016-08-16 09:00:00	4614
2016-08-16 09:10:00	4961
2016-08-16 09:20:00	4772
2016-08-16 09:30:00	4877
2016-08-16 09:40:00	2868
2016-08-16 09:50:00	2911
2016-08-16 10:00:00	2859
2016-08-16 10:10:00	2855
2016-08-16 10:20:00	2885
2016-08-16 10:30:00	2850
2016-08-16 10:40:00	2790
2016-08-16 10:50:00	2855
2016-08-16 11:00:00	2845
2016-08-16 11:10:00	2916
2016-08-16 11:20:00	2829
2016-08-16 11:30:00	2787
2016-08-16 11:40:00	2815
2016-08-16 11:50:00	2930
2016-08-16 12:00:00	2761
2016-08-16 12:10:00	2823
2016-08-16 12:20:00	2777
2016-08-16 12:30:00	3223
2016-08-16 12:40:00	3050
2016-08-16 12:50:00	2629
2016-08-16 13:00:00	5523
2016-08-16 13:10:00	6143
2016-08-16 13:20:00	5058
2016-08-16 13:30:00	6877
2016-08-16 13:40:00	4882
2016-08-16 13:50:00	5232
2016-08-16 14:00:00	6646
2016-08-16 14:10:00	7130
2016-08-16 14:20:00	6820
2016-08-16 14:30:00	5213
2016-08-16 14:40:00	5620
2016-08-16 14:50:00	6302
2016-08-16 15:00:00	5235
2016-08-16 15:10:00	6245
2016-08-16 15:20:00	4789
2016-08-16 15:30:00	5335
2016-08-16 15:40:00	4591
2016-08-16 15:50:00	6246
2016-08-16 16:00:00	6293
2016-08-16 16:10:00	4762
2016-08-16 16:20:00	4251
2016-08-16 16:30:00	2838
2016-08-16 16:40:00	4445
2016-08-16 16:50:00	6899
2016-08-16 17:00:00	5647
2016-08-16 17:10:00	5216
2016-08-16 17:20:00	5255
2016-08-16 17:30:00	3544
2016-08-16 17:40:00	2864
2016-08-16 17:50:00	3243
2016-08-16 18:00:00	3479
2016-08-16 18:10:00	3744
2016-08-16 18:20:00	2845
2016-08-16 18:30:00	2781
2016-08-16 18:40:00	3562
2016-08-16 18:50:00	4017
2016-08-16 19:00:00	5241
2016-08-16 19:10:00	5819
2016-08-16 19:20:00	5635
2016-08-16 19:30:00	6415
2016-08-16 19:40:00	4253
2016-08-16 19:50:00	4349
2016-08-16 20:00:00	5102
2016-08-16 20:10:00	4173
2016-08-16 20:20:00	4204
2016-08-16 20:30:00	5145
2016-08-16 20:40:00	5763
2016-08-16 20:50:00	6521
2016-08-16 21:00:00	6393
2016-08-16 21:10:00	5558
2016-08-16 21:20:00	4872
2016-08-16 21:30:00	5567
2016-08-16 21:40:00	5139
2016-08-16 21:50:00	5061
2016-08-16 22:00:00	4986
2016-08-16 22:10:00	4966
2016-08-16 22:20:00	4631
2016-08-16 22:30:00	4823
2016-08-16 22:40:00	4719
2016-08-16 22:50:00	4932
2016-08-16 23:00:00	4986
2016-08-16 23:10:00	6180
2016-08-16 23:20:00	6882
2016-08-16 23:30:00	6898
2016-08-16 23:40:00	6938
2016-08-16 23:50:00	6186
2016-08-17	5749
2016-08-17 00:10:00	6290
2016-08-17 00:20:00	5519
2016-08-17 00:30:00	3900
2016-08-17 00:40:00	2479
2016-08-17 00:50:00	2549
2016-08-17 01:00:00	2600
2016-08-17 01:10:00	2720
2016-08-17 01:20:00	2698
2016-08-17 01:30:00	2682
2016-08-17 01:40:00	2824
2016-08-17 01:50:00	2878
2016-08-17 02:00:00	2845
2016-08-17 02:10:00	3043
2016-08-17 02:20:00	2990
2016-08-17 02:30:00	4190
2016-08-17 02:40:00	5288
2016-08-17 02:50:00	5449
2016-08-17 03:00:00	5319
2016-08-17 03:10:00	5126
2016-08-17 03:20:00	5533
2016-08-17 03:30:00	5986
2016-08-17 03:40:00	5318
2016-08-17 03:50:00	5695
2016-08-17 04:00:00	7081
2016-08-17 04:10:00	6871
2016-08-17 04:20:00	6833
2016-08-17 04:30:00	6846
2016-08-17 04:40:00	6171
2016-08-17 04:50:00	5528
2016-08-17 05:00:00	4823
2016-08-17 05:10:00	4703
2016-08-17 05:20:00	3889
2016-08-17 05:30:00	4779
2016-08-17 05:40:00	6257
2016-08-17 05:50:00	6726
2016-08-17 06:00:00	5189
2016-08-17 06:10:00	6007
2016-08-17 06:20:00	5707
2016-08-17 06:30:00	6530
2016-08-17 06:40:00	6905
2016-08-17 06:50:00	6766
2016-08-17 07:00:00	5827
2016-08-17 07:10:00	6844
2016-08-17 07:20:00	6494
2016-08-17 07:30:00	6824
2016-08-17 07:40:00	6348
2016-08-17 07:50:00	5305
2016-08-17 08:00:00	3450
2016-08-17 08:10:00	4152
2016-08-17 08:20:00	4352
2016-08-17 08:30:00	4478
2016-08-17 08:40:00	4964
2016-08-17 08:50:00	2746
2016-08-17 09:00:00	1785
2016-08-17 09:10:00	1833
2016-08-17 09:20:00	2070
2016-08-17 09:30:00	6198
2016-08-17 09:40:00	5230
2016-08-17 09:50:00	4568
2016-08-17 10:00:00	5079
2016-08-17 10:10:00	3470
2016-08-17 10:20:00	3007
2016-08-17 10:30:00	2991
2016-08-17 10:40:00	3605
2016-08-17 10:50:00	4364
2016-08-17 11:00:00	3069
2016-08-17 11:10:00	2780
2016-08-17 11:20:00	2729
2016-08-17 11:30:00	2855
2016-08-17 11:40:00	2790
2016-08-17 11:50:00	2828
2016-08-17 12:00:00	2905
2016-08-17 12:10:00	2862
2016-08-17 12:20:00	2863
2016-08-17 12:30:00	3089
2016-08-17 12:40:00	2879
2016-08-17 12:50:00	3618
2016-08-17 13:00:00	4984
2016-08-17 13:10:00	3709
2016-08-17 13:20:00	5042
2016-08-17 13:30:00	6296
2016-08-17 13:40:00	5693
2016-08-17 13:50:00	5954
2016-08-17 14:00:00	4452
2016-08-17 14:10:00	2668
2016-08-17 14:20:00	3970
2016-08-17 14:30:00	4977
2016-08-17 14:40:00	5387
2016-08-17 14:50:00	6065
2016-08-17 15:00:00	3611
2016-08-17 15:10:00	3761
2016-08-17 15:20:00	5536
2016-08-17 15:30:00	5610
2016-08-17 15:40:00	4199
2016-08-17 15:50:00	4406
2016-08-17 16:00:00	2552
2016-08-17 16:10:00	3200
2016-08-17 16:20:00	2588
2016-08-17 16:30:00	3619
2016-08-17 16:40:00	3352
2016-08-17 16:50:00	3397
2016-08-17 17:00:00	3050
2016-08-17 17:10:00	5270
2016-08-17 17:20:00	6003
2016-08-17 17:30:00	4842
2016-08-17 17:40:00	5821
2016-08-17 17:50:00	5794
2016-08-17 18:00:00	5547
2016-08-17 18:10:00	4130
2016-08-17 18:20:00	4684
2016-08-17 18:30:00	4856
2016-08-17 18:40:00	4642
2016-08-17 18:50:00	4971
2016-08-17 19:00:00	3341
2016-08-17 19:10:00	2782
2016-08-17 19:20:00	2680
2016-08-17 19:30:00	5668
2016-08-17 19:40:00	2947
2016-08-17 19:50:00	4974
2016-08-17 20:00:00	5543
2016-08-17 20:10:00	4460
2016-08-17 20:20:00	3220
2016-08-17 20:30:00	4671
2016-08-17 20:40:00	4232
2016-08-17 20:50:00	2659
2016-08-17 21:00:00	2809
2016-08-17 21:10:00	2496
2016-08-17 21:20:00	2512
2016-08-17 21:30:00	3053
2016-08-17 21:40:00	3524
2016-08-17 21:50:00	4153
2016-08-17 22:00:00	3536
2016-08-17 22:10:00	4588
2016-08-17 22:20:00	5377
2016-08-17 22:30:00	5850
2016-08-17 22:40:00	8399
2016-08-17 22:50:00	7634
2016-08-17 23:00:00	9550
2016-08-17 23:10:00	8009
2016-08-17 23:20:00	8445
2016-08-17 23:30:00	5529
2016-08-17 23:40:00	9241
2016-08-17 23:50:00	9730
2016-08-18	9694
2016-08-18 00:10:00	9554
[truncated: 72,879 more rows]
